# Supplementary material
Source: PubMed Central journal article supplement (PMC5070499)
Supplement: supp_2015-0272_Supplemental_Information.pdf [file supp_2015-0272_Supplemental_Information.pdf]

Supplementary Table 1: Differentially expressed genes in late stage type 1 diabetes compared to HC 1.5 fold change lower bound 90% CI

| probe set    | gene                                                                                                                                                              | Accession | EntrezGene                   | Description                                                                                                                                                                                                                                                                                                                                                                                                                                                                          | HC_109nMSC_HG_U133_Plus_2)_CEL | HC_110nMSC_HG_U133_Plus_2)_CEL | HC_RO1_HG_U133_Plus_2)_CEL | baseline mean | baseline mean's SE | LS_T1D_A02_HG_U133_Plus_2)_CEL | LS_T1D_A03_HG_U133_Plus_2)_CEL | LS_T1D_A05_HG_U133_Plus_2)_CEL | experiment mean | experiment mean's SE | fold change | lower bound of FC | upper bound of FC | filtered |
|--------------|-------------------------------------------------------------------------------------------------------------------------------------------------------------------|-----------|------------------------------|--------------------------------------------------------------------------------------------------------------------------------------------------------------------------------------------------------------------------------------------------------------------------------------------------------------------------------------------------------------------------------------------------------------------------------------------------------------------------------------|--------------------------------|--------------------------------|----------------------------|---------------|--------------------|--------------------------------|--------------------------------|--------------------------------|-----------------|----------------------|-------------|-------------------|-------------------|----------|
| 1552610_a_at | JAK1: Janus kinase 1 (a protein tyrosine kinase)                                                                                                                  | NM_002227 | 3716                         | gb:NM_002227.1/DB_XREF=gi:4504802/GEN=JAK1/TID=Hs2.50651.1/CNT=135/FEA=FlmRNA/TIER=FL/STK=2/LL=3716/UG=Hs.50651/DEF=Homo sapiens Janus kinase 1 (a protein tyrosine kinase) (JAK1), mRNA, /PROD=janus kinase 1 /FL=gb:M64174.1 gb:NM_002227.1                                                                                                                                                                                                                                        | 32,87                          | 19,49                          | 25,26                      | 25,87         | 3,87               | 77,26                          | 60,81                          | 53,6                           | 63,89           | 7                    | 2,47        | 1,84              | 3,42              | *        |
| 1552658_s_at | NAV3: neuron navigator 3                                                                                                                                          | NM_014903 | 89795                        | gb:NM_014903.2/DB_XREF=gi:27734089/GEN=NAV3/TID=Hs2.174188.1/CNT=31/FEA=FlmRNA/TIER=FL/STK=2/LL=89795/UG=Hs.174188/DEF=Homo sapiens neuron navigator 3 (NAV3), mRNA, /PROD=neuron navigator 3 /FL=gb:NM_014903.2 gb:NM_144975.1/DB_XREF=gi:21450660/TID=Hs2.352216.1/CNT=2/FEA=FlmRNA/TIER=FL/STK=2/LL=162394/UG_GENE=MGC19764/UG=Hs.352216/UG_TITLE=hypothetical protein MGC19764/DEF=Homo sapiens hypothetical protein MGC19764 (MGC19764), mRNA, /FL=gb:NM_144975.1 gb:BC021238.1 | 30,35                          | 13,38                          | 3,92                       | 15,88         | 7,73               | 38,69                          | 57,31                          | 42,09                          | 46,03           | 5,72                 | 2,9         | 1,53              | 14,6              | *        |
| 1553055_a_at | SLFN5: schlafen family member 5                                                                                                                                   | NM_144975 | 162394                       | gb:NM_144975.1/DB_XREF=gi:21450660/TID=Hs2.352216.1/CNT=2/FEA=FlmRNA/TIER=FL/STK=2/LL=162394/UG_GENE=MGC19764/UG=Hs.352216/UG_TITLE=hypothetical protein MGC19764/DEF=Homo sapiens hypothetical protein MGC19764 (MGC19764), mRNA, /FL=gb:NM_144975.1 gb:BC021238.1                                                                                                                                                                                                                  | 11,58                          | 13,42                          | 3,53                       | 9,51          | 3,04               | 31,14                          | 26,82                          | 21,7                           | 26,55           | 2,73                 | 2,79        | 1,76              | 5,95              | *        |
| 1553112_s_at | CDK8: cyclin-dependent kinase 8                                                                                                                                   | NM_001260 | 1024                         | gb:NM_001260.1/DB_XREF=gi:4502744/GEN=CDK8/TID=Hs2.397734.1/CNT=32/FEA=FlmRNA/TIER=FL/STK=1/LL=1024/UG=Hs.397734/DEF=Homo sapiens cyclin-dependent kinase 8 (CDK8), mRNA, /PROD=cyclin-dependent kinase 8 /FL=gb:NM_001260.1                                                                                                                                                                                                                                                         | 23,7                           | 13,79                          | 8,48                       | 15,32         | 4,46               | 32,56                          | 45,83                          | 37,4                           | 38,59           | 3,88                 | 2,52        | 1,63              | 4,9               | *        |
| 1553117_a_at | STK38: serine/threonine kinase 38                                                                                                                                 | NM_007271 | 11329                        | gb:NM_007271.1/DB_XREF=gi:6005813/GEN=STK38/TID=Hs2.8724.1/CNT=37/FEA=FlmRNA/TIER=FL/STK=1/LL=11329/UG=Hs.8724/DEF=Homo sapiens serine/threonine kinase 38 (STK38), mRNA, /PROD=serine/threonine kinase 38 /FL=gb:NM_007271.1                                                                                                                                                                                                                                                        | 41,02                          | 28,46                          | 15,34                      | 28,27         | 7,41               | 96,16                          | 83,25                          | 59,12                          | 79,51           | 10,85                | 2,81        | 1,81              | 5,1               | *        |
| 1553685_s_at | SP1: Sp1 transcription factor                                                                                                                                     | NM_138473 | 6667                         | gb:NM_138473.1/DB_XREF=gi:19924004/TID=Hs2.348374.1/CNT=35/FEA=FlmRNA/TIER=FL/STK=0/LL=144467/UG_GENE=LOC144467/UG=Hs.348374/UG_TITLE=hypothetical protein BC012008/DEF=Homo sapiens hypothetical protein BC012008 (LOC144467), mRNA, /FL=gb:NM_138473.1 gb:BC012008.1                                                                                                                                                                                                               | 7,57                           | 5,98                           | 4,14                       | 5,9           | 0,99               | 12,32                          | 15,63                          | 10,56                          | 12,84           | 1,49                 | 2,18        | 1,58              | 3,14              | *        |
| 1554027_a_at | SLC4A4: solute carrier family 4, sodium bicarbonate cotransporter, member 4                                                                                       | BC030977  | 8671                         | gb:BC030977.1/DB_XREF=gi:21411309/TID=Hs2.5462.2/CNT=13/FEA=FlmRNA/TIER=FL/STK=6/LL=8671/UG_GENE=SLC4A4/UG=Hs.5462/DEF=Homo sapiens, Similar to solute carrier family 4, sodium bicarbonate cotransporter, member 4, clone MGC-32627 IMAGE4610968, mRNA, complete cds, /PROD=Similar to solute carrier family 4, sodium bicarbonate cotransporter, member 4 /FL=gb:BC030977.1                                                                                                        | 8,27                           | 6,43                           | 4,61                       | 6,44          | 1,06               | 19,28                          | 20,83                          | 18,79                          | 1,35            | 2,92                 | 2,23        | 4,07              | *                 |          |
| 1554726_at   | ZNF655: zinc finger protein 655                                                                                                                                   | AY099353  | 79027                        | gb:AY099353.1/DB_XREF=gi:2252707/GEN=VIK/TID=Hs2.115659.3/CNT=4/FEA=FlmRNA/TIER=FL/STK=1/LL=79027/UG=Hs.115659/DEF=Homo sapiens vav-1 interacting Kruppel-like protein (VIK) mRNA, complete cds, /PROD=vav-1 interacting Kruppel-like protein /FL=gb:AY099353.1                                                                                                                                                                                                                      | 7,5                            | 3,88                           | 3,53                       | 4,97          | 1,27               | 12,57                          | 10,44                          | 9,93                           | 10,98           | 0,81                 | 2,21        | 1,52              | 3,85              | *        |
| 1554885_a_at | PRIM2A: primase, polypeptide 2A, 58kDa                                                                                                                            | BC017833  | 5558                         | gb:BC017833.1/DB_XREF=gi:17389608/TID=Hs2.74519.2/CNT=3/FEA=FlmRNA/TIER=FL/STK=1/LL=5558/UG_GENE=PRIM2A/UG=Hs.74519/DEF=Homo sapiens, Similar to primase, polypeptide 2A (58kD), clone MGC-22486 IMAGE4307922, mRNA, complete cds, /PROD=Similar to primase, polypeptide 2A (58kD) /FL=gb:BC017833.1                                                                                                                                                                                 | 14,03                          | 10,8                           | 6,41                       | 10,41         | 2,21               | 23,19                          | 27,2                           | 22,73                          | 24,37           | 1,42                 | 2,34        | 1,71              | 3,63              | *        |
| 1554930_a_at | FUT8: fucosyltransferase 8 (alpha 1,6) fucosyltransferase                                                                                                         | AB049740  | 2530                         | gb:AB049740.2/DB_XREF=gi:18265337/TID=Hs2.118722.3/CNT=3/FEA=FlmRNA/TIER=FL/STK=1/LL=2530/UG_GENE=FUT8/UG=Hs.118722/DEF=Homo sapiens mRNA for alpha 1,6-fucosyltransferase, complete cds, /PROD=alpha 1,6-fucosyltransferase /FL=gb:AB049740.2                                                                                                                                                                                                                                       | 25,15                          | 10,83                          | 14,41                      | 16,79         | 4,3                | 38,58                          | 47,52                          | 47,49                          | 44,53           | 2,98                 | 2,65        | 1,83              | 4,62              | *        |
| 1554997_a_at | PTGS2: prostaglandin-endoperoxide synthase 2 (prostaglandin G/H synthase and cyclooxygenase)                                                                      | AY151286  | 5743                         | gb:AY151286.1/DB_XREF=gi:24430027/TID=Hs2.196384.2/CNT=2/FEA=FlmRNA/TIER=FL/STK=1/LL=5743/UG_GENE=PTGS2/UG=Hs.196384/DEF=Homo sapiens cyclooxygenase 2b mRNA, complete cds; alternatively spliced, /PROD=cyclooxygenase 2b /FL=gb:AY151286.1                                                                                                                                                                                                                                         | 3,56                           | 3,07                           | 3,53                       | 3,38          | 0,16               | 39,15                          | 9,26                           | 19,87                          | 22,76           | 8,75                 | 6,73        | 2,47              | 11,06             | *        |
| 1555097_a_at | PTGFR: prostaglandin F receptor (FP)                                                                                                                              | BC035694  | 5737                         | gb:BC035694.1/DB_XREF=gi:23272756/TID=Hs2.89418.2/CNT=2/FEA=FlmRNA/TIER=FL/STK=1/LL=5737/UG_GENE=PTGFR/UG=Hs.89418/DEF=Homo sapiens, prostaglandin F receptor (FP), clone MGC-46203 IMAGE-5760478, mRNA, complete cds, /PROD=prostaglandin F receptor [FP] /FL=gb:BC035694.1                                                                                                                                                                                                         | 4,18                           | 3,56                           | 4,14                       | 3,96          | 0,2                | 29,33                          | 13,83                          | 16,92                          | 20,03           | 4,74                 | 5,05        | 3,07              | 7,11              | *        |
| 1555154_a_at | QKI: quaking homolog, KH domain RNA binding (mouse)                                                                                                               | AF142421  | 9444                         | gb:AF142421.1/DB_XREF=gi:7542354/GEN=QUAKING/TID=Hs2.15020.4/CNT=2/FEA=FlmRNA/TIER=FL/STK=1/LL=9444/UG=Hs.15020/DEF=Homo sapiens QUAKING isoform 5 (QUAKING) mRNA, complete cds, /PROD=QUAKING isoform 5 /FL=gb:AF142421.1 gb:AF142420.1                                                                                                                                                                                                                                             | 33,26                          | 22,48                          | 18,29                      | 24,68         | 4,46               | 64,52                          | 70,25                          | 52,17                          | 62,31           | 5,33                 | 2,53        | 1,87              | 3,67              | *        |
| 1555202_a_at | P15RS: hypothetical protein FU10656                                                                                                                               | BC010136  | 55197                        | gb:BC010136.1/DB_XREF=gi:14603355/TID=Hs2.300906.2/CNT=2/FEA=FlmRNA/TIER=FL/STK=1/LL=55197/UG_GENE=P15RS/UG=Hs.300906/DEF=Homo sapiens, clone MGC-19513 IMAGE4109857, mRNA, complete cds, /PROD=Unknown protein for MGC-19513 /FL=gb:BC010136.1                                                                                                                                                                                                                                      | 6,17                           | 4,96                           | 4,55                       | 5,23          | 0,49               | 8,35                           | 10,91                          | 10,98                          | 10,08           | 0,86                 | 1,93        | 1,57              | 2,38              | *        |
| 1555240_s_at | GNGL2: guanine nucleotide binding protein (G protein), gamma 12                                                                                                   | AF493879  | 55970                        | gb:AF493879.1/DB_XREF=gi:20147650/GEN=GNGL2/TID=Hs2.8107.2/CNT=2/FEA=FlmRNA/TIER=FL/STK=1/LL=55970/UG=Hs.8107/DEF=Homo sapiens guanine nucleotide binding protein gamma 12 (GNGL2) mRNA, complete cds, /PROD=guanine nucleotide binding protein gamma 12 /FL=gb:AF493879.1                                                                                                                                                                                                           | 74                             | 47,72                          | 6,54                       | 42,75         | 19,63              | 177,6                          | 220,3                          | 108,81                         | 168,9           | 32,48                | 3,95        | 1,99              | 16,41             | *        |
| 1555247_a_at | RAPGEF6: Rap guanine nucleotide exchange factor (GEF) 6                                                                                                           | AF394782  | 51735                        | gb:AF394782.1/DB_XREF=gi:15077825/TID=Hs2.174795.3/CNT=1/FEA=FlmRNA/TIER=FL/STK=1/LL=51735/UG_GENE=RA-GEF-2/UG=Hs.174795/DEF=Homo sapiens rap guanine nucleotide exchange factor mRNA, complete cds, /PROD=rap guanine nucleotide exchange factor /FL=gb:AF394782.1                                                                                                                                                                                                                  | 6,29                           | 4,3                            | 3,45                       | 4,68          | 0,84               | 8,16                           | 9,85                           | 10,83                          | 9,61            | 0,78                 | 2,06        | 1,53              | 2,97              | *        |
| 1555326_a_at | ADAM9: ADAM metalloproteinase domain 9 (meltrin gamma)                                                                                                            | AF495383  | 8754                         | gb:AF495383.1/DB_XREF=gi:2135965/GEN=ADAM9/TID=Hs2.2442.2/CNT=1/FEA=FlmRNA/TIER=FL/STK=1/LL=8754/UG=Hs.2442/DEF=Homo sapiens disintegrin metalloproteinase domain 9 short protein precursor (ADAM9) mRNA, complete cds; alternatively spliced, /PROD=disintegrin metalloproteinase domain 9 short protein precursor /FL=gb:AF495383.1                                                                                                                                                | 32,33                          | 19,67                          | 16,03                      | 22,68         | 4,94               | 59,71                          | 48,18                          | 45,1                           | 51              | 4,45                 | 2,25        | 1,59              | 3,57              | *        |
| 1555334_s_at | SLC30A5: solute carrier family 30 (zinc transporter), member 5                                                                                                    | AF493924  | 64924                        | gb:AF493924.1/DB_XREF=gi:19071290/GEN=ZTL1/TID=Hs2Afx.1.207/CNT=1/FEA=FlmRNA/TIER=FL/STK=1/LL=64924/NOTE=sequence(s) not in UniGene /DEF=Homo sapiens zinc transporter ZTL1 (ZTL1) mRNA, complete cds, /PROD=zinc transporter ZTL1 /FL=gb:AF493924.1                                                                                                                                                                                                                                 | 39,97                          | 19,87                          | 8,13                       | 22,66         | 9,3                | 72                             | 81,97                          | 63,69                          | 72,55           | 5,28                 | 3,2         | 1,88              | 9,88              | *        |
| 1555388_s_at | SNX25: sorting nexin 25                                                                                                                                           | BC029868  | 83891                        | gb:BC029868.1/DB_XREF=gi:20987397/TID=Hs2.306881.2/CNT=1/FEA=FlmRNA/TIER=FL/STK=1/LL=83891/UG_GENE=MSTP043/UG=Hs.306881/DEF=Homo sapiens, Similar to MSTP043 protein, clone MGC-34107 IMAGE5171892, mRNA, complete cds, /PROD=Similar to MSTP043 protein /FL=gb:BC029868.1                                                                                                                                                                                                           | 31,92                          | 27,27                          | 12,66                      | 23,95         | 5,8                | 74,78                          | 76,09                          | 48,86                          | 66,58           | 8,87                 | 2,78        | 1,83              | 4,78              | *        |
| 1555411_a_at | CCNL1: cyclin L1                                                                                                                                                  | AF367476  | 57018                        | gb:AF367476.1/DB_XREF=gi:20385176/TID=Hs2.4859.3/CNT=1/FEA=FlmRNA/TIER=FL/STK=1/LL=57018/UG_GENE=LOC57018/UG=Hs.4859/DEF=Homo sapiens cyclin L beta mRNA, complete cds; alternatively spliced, /PROD=cyclin L beta /FL=gb:AF367476.1                                                                                                                                                                                                                                                 | 28,85                          | 15,44                          | 7,56                       | 17,29         | 6,22               | 49,26                          | 42,08                          | 48,57                          | 46,64           | 2,29                 | 2,7         | 1,68              | 6,62              | *        |
| 1555460_a_at | SLC39A6: solute carrier family 39 (zinc transporter), member 6                                                                                                    | BC039498  | 25800                        | gb:BC039498.1/DB_XREF=gi:2465963/TID=Hs2.79136.2/CNT=1/FEA=FlmRNA/TIER=FL/STK=1/LL=25800/UG_GENE=LIV-1/UG=Hs.79136/DEF=Homo sapiens, Similar to Liv-1 protein, estrogen regulated, clone MGC-50406 IMAGE552785, mRNA, complete cds, /PROD=Similar to Liv-1 protein, estrogen regulated /FL=gb:BC039498.1                                                                                                                                                                             | 20,4                           | 14,71                          | 8,17                       | 14,42         | 3,53               | 40,64                          | 38,67                          | 28,28                          | 35,87           | 3,83                 | 2,49        | 1,68              | 4,26              | *        |
| 1555561_a_at | UGCGL2: UDP-glucose ceramide glucosyltransferase-like 2                                                                                                           | BC032302  | 55757                        | gb:BC032302.1/DB_XREF=gi:21619565/TID=Hs2.22983.2/CNT=1/FEA=FlmRNA/TIER=FL/STK=1/LL=55757/UG_GENE=UGCGL2/UG=Hs.22983/DEF=Homo sapiens, similar to UDP-glucose ceramide glucosyltransferase-like 2, clone MGC-40268 IMAGE5169731, mRNA, complete cds, /PROD=Similar to UDP-glucose ceramide glucosyltransferase-like 2 /FL=gb:BC032302.1                                                                                                                                              | 10,68                          | 7,9                            | 3,84                       | 7,47          | 1,98               | 20,67                          | 16,6                           | 18,24                          | 18,5            | 1,18                 | 2,48        | 1,69              | 4,43              | *        |
| 1555609_a_at | ZMAT3: zinc finger, matrix type 3                                                                                                                                 | AF355465  | 64393                        | gb:AF355465.1/DB_XREF=gi:15077640/TID=Hs2.252406.3/CNT=1/FEA=FlmRNA/TIER=FL/STK=1/LL=64393/UG_GENE=WIG1/UG=Hs.252406/DEF=Homo sapiens WIG-1/PAGE608 protein mRNA, complete cds, /PROD=WIG-1/PAGE608 protein /FL=gb:AF355465.1                                                                                                                                                                                                                                                        | 10,16                          | 10,52                          | 7,06                       | 9,25          | 1,1                | 26,72                          | 29,34                          | 13,01                          | 23,03           | 5,06                 | 2,49        | 1,54              | 3,64              | *        |
| 1555830_s_at | FAM62B: family with sequence similarity 62 (C2 domain containing) member B                                                                                        | BC001224  | 57488                        | gb:BC001224.1/DB_XREF=gi:12654762/TID=Hs2Afx.1.469/CNT=1/FEA=FlmRNA/TIER=ConsEnd/STK=0/NOTE=sequence(s) not in UniGene /DEF=Homo sapiens, clone MGC-982 IMAGE3354306, mRNA, complete cds, /PROD=Unknown protein for MGC-982 /FL=gb:BC001224.1                                                                                                                                                                                                                                        | 17,28                          | 10,35                          | 4,54                       | 10,72         | 3,68               | 35,61                          | 38,35                          | 22,72                          | 32,23           | 4,82                 | 3,01        | 1,76              | 7,07              | *        |
| 1557181_s_at | LOC399947: similar to expressed sequence A1593442                                                                                                                 | AA633992  | 399947                       | gb:AA633992/DB_XREF=gi:2557206/DB_XREF=ac330g2.s1/CLONE=IMAGE-858290/TID=Hs2.172982.1/CNT=12/FEA=mRNA/TIER=ConsEnd/STK=1/UG=Hs.172982/UG_TITLE=Homo sapiens cDNA FLJ33767 fis, clone BRHIP000108, /FL=gb:AA633992                                                                                                                                                                                                                                                                    | 7,93                           | 10,24                          | 4,04                       | 7,4           | 1,81               | 13,67                          | 18,04                          | 24,28                          | 18,66           | 3,08                 | 2,52        | 1,59              | 4,43              | *        |
| 1558636_s_at | ADAMTS5: ADAM metalloproteinase with thrombospondin type 1 motif, 5 (aggrecanase-2)                                                                               | BI254089  | 11096                        | gb:BI254089/DB_XREF=gi:14806159/DB_XREF=602978195F1/CLONE=IMAGE-5123159/TID=Hs2.407354.1/CNT=8/FEA=mRNA/TIER=ConsEnd/STK=0/UG=Hs.407354/UG_TITLE=Homo sapiens full length insert cDNA clone ZD50E03 /FL=gb:BI254089                                                                                                                                                                                                                                                                  | 2,8                            | 3,86                           | 2,73                       | 3,13          | 0,36               | 13,52                          | 7,08                           | 8,14                           | 9,58            | 1,99                 | 3,06        | 1,95              | 4,41              | *        |
| 1558882_at   | LOC401233: similar to HIV TAT specific factor 1; cofactor required for Tat activation of HIV-1 transcription                                                      | BI868572  | 401233                       | gb:BI868572/DB_XREF=gi:16042245/DB_XREF=603392679F1/CLONE=IMAGE-5402706/TID=Hs2.435991.1/CNT=6/FEA=mRNA/TIER=ConsEnd/STK=0/UG=Hs.435991/UG_TITLE=Homo sapiens, clone IMAGE-5289038, mRNA, /FL=gb:BI868572                                                                                                                                                                                                                                                                            | 2,43                           | 2,92                           | 2,21                       | 2,52          | 0,21               | 20,99                          | 9,13                           | 9,36                           | 13,16           | 3,92                 | 5,22        | 2,64              | 8                 | *        |
| 1559249_at   | ATXN1: Ataxin 1                                                                                                                                                   | BC010948  | 6310                         | gb:BC010948.1/DB_XREF=gi:15301440/TID=Hs2.39648.1/CNT=6/FEA=mRNA/TIER=ConsEnd/STK=0/UG=Hs.39648/UG_TITLE=Homo sapiens, clone IMAGE428285A, mRNA, /DEF=Homo sapiens, clone IMAGE428285A, mRNA, /FL=gb:BC010948.1                                                                                                                                                                                                                                                                      | 9,16                           | 8,04                           | 4,03                       | 7,08          | 1,56               | 20,17                          | 11,64                          | 23,11                          | 18,31           | 3,44                 | 2,59        | 1,6               | 4,35              | *        |
| 1559952_x_at | FAM66C /// FAM66E /// LOC647351: family with sequence similarity 66, member C /// family with sequence similarity 66, member E /// hypothetical protein LOC647351 | A1140607  | 440078 /// 441342 /// 647351 | gb:A1140607/DB_XREF=gi:3648064/DB_XREF=nc05f05.s1/CLONE=IMAGE:1738113/TID=Hs2.429718.1/CNT=4/FEA=mRNA/TIER=ConsEnd/STK=0/UG=Hs.429718/UG_TITLE=Homo sapiens beta-defensin 109 (DEFB109) pseudogene mRNA, partial sequence                                                                                                                                                                                                                                                            | 18,36                          | 19,21                          | 19,58                      | 19,05         | 0,36               | 11,58                          | 10,98                          | 7,87                           | 10,14           | 1,15                 | -1,88       | -2,31             | *                 |          |
| 1559965_at   | LOC646345: hypothetical protein LOC646345                                                                                                                         | BC037827  | 646345                       | gb:BC037827.1/DB_XREF=gi:23138647/TID=Hs2.205434.1/CNT=7/FEA=mRNA/TIER=ConsEnd/STK=0/UG=Hs.205434/UG_TITLE=Homo sapiens, clone IMAGE4811567, mRNA, /DEF=Homo sapiens, clone IMAGE4811567, mRNA, /FL=gb:BC037827.1                                                                                                                                                                                                                                                                    | 8,28                           | 9,09                           | 3,72                       | 7,03          | 1,67               | 28,62                          | 21,63                          | 24,89                          | 25,05           | 2,02                 | 3,56        | 2,48              | 5,93              | *        |

|              |                                                                                                                                                                                                                                                                                                                                                                                                                |           |                                                                                          |                                                                                                                                                                                                                                                                                                                                                                                                                                                                                                                                                                                                                                                           |        |        |        |        |        |         |         |         |         |        |       |       |            |
|--------------|----------------------------------------------------------------------------------------------------------------------------------------------------------------------------------------------------------------------------------------------------------------------------------------------------------------------------------------------------------------------------------------------------------------|-----------|------------------------------------------------------------------------------------------|-----------------------------------------------------------------------------------------------------------------------------------------------------------------------------------------------------------------------------------------------------------------------------------------------------------------------------------------------------------------------------------------------------------------------------------------------------------------------------------------------------------------------------------------------------------------------------------------------------------------------------------------------------------|--------|--------|--------|--------|--------|---------|---------|---------|---------|--------|-------|-------|------------|
| 1562062_at   | NBP1 /// NBP3 /// NBP11 /// NBP20 /// NBP9 /// NBP10 /// NBP8:<br>neuroblastoma breakpoint family, member 1 /// neuroblastoma breakpoint<br>family, member 3 /// neuroblastoma breakpoint family, member 11 ///<br>neuroblastoma breakpoint family, member 20 /// neuroblastoma breakpoint<br>family, member 5 /// neuroblastoma breakpoint family, member 10 ///<br>neuroblastoma breakpoint family, member 8 | BM041211  | 200030 ///<br>400818 ///<br>440670 ///<br>440673 ///<br>55672 ///<br>641559 ///<br>84224 | gb:BM041211 /DB_XREF=gi:16770478 /DB_XREF=603614396F1 /CLONE=IMAGE:5420423 /TID=Hs2.351620.1 /CNT=3<br>/FEA=mRNA /TIER=Consens /STK=0 /UG=Hs.351620 /UG_TITLE=Homo sapiens cDNA FLJ40685.fis, clone THYM2023943.<br>/gb:AK093081.1 /DB_XREF=gi:21751833 /TID=Hs2.5518.4 /CNT=1 /FEA=mRNA /TIER=Consens /STK=0 /UG=Hs.253943<br>/UG_GENE=FLJ31657 /UG=Hs.5518 /UG_TITLE=hypothetical protein FLJ31657 /DEF=Homo sapiens cDNA FLJ35762.fis, clone                                                                                                                                                                                                           | 58.6   | 63.21  | 90.7   | 70.84  | 10.02  | 33.15   | 38.47   | 35.52   | 35.71   | 1.54   | -1.98 | -1.51 | -2.48 *    |
| 1564053_a_at | YTHDF3: YTH domain family, member 3                                                                                                                                                                                                                                                                                                                                                                            | AK093081  | 253943                                                                                   | TEST2004793, moderately similar to Homo sapiens NW-REN-2 antigen mRNA.<br>/gb:AY094612.1 /DB_XREF=gi:121217409 /TID=Hs2.374678.1 /CNT=1 /FEA=mRNA /TIER=Consens /STK=0 /UG=Hs.374678<br>/UG_TITLE=Homo sapiens multiple myeloma susceptibility mRNA sequence /DEF=Homo sapiens multiple myeloma<br>susceptibility mRNA sequence.                                                                                                                                                                                                                                                                                                                          | 28.53  | 16.27  | 5.25   | 16.68  | 6.72   | 61.81   | 55.14   | 58.89   | 58.62   | 1.93   | 3.51  | 2.11  | 10.49 *    |
| 1566887_x_at | Multiple myeloma susceptibility mRNA sequence                                                                                                                                                                                                                                                                                                                                                                  | AY094612  |                                                                                          |                                                                                                                                                                                                                                                                                                                                                                                                                                                                                                                                                                                                                                                           | 129.16 | 225.03 | 262.85 | 205.68 | 39.79  | 78.28   | 90.05   | 103.55  | 90.63   | 7.3    | -2.27 | -1.52 | -3.1 *     |
| 1569253_at   | INTS4: integrator complex subunit 4                                                                                                                                                                                                                                                                                                                                                                            | BC018672  | 92105                                                                                    | gb:BC018672.1 /DB_XREF=gi:17391479 /TID=Hs2.367149.1 /CNT=6 /FEA=mRNA /TIER=Consens /STK=0 /UG=Hs.367149<br>/UG_TITLE=Homo sapiens, clone IMAGE:4280013, mRNA /DEF=Homo sapiens, clone IMAGE:4280013, mRNA.<br>/gb:NM_000291.1 /DB_XREF=gi:4505762 /GEN=PGK1 /FEA=FlmRNA /CNT=450 /TID=Hs.78771.0 /TIER=FL-Stack /STK=249<br>/UG=Hs.78771 /LL=5230 /DEF=Homo sapiens phosphoglycerate kinase 1 (PGK1), mRNA. /PROD=phosphoglycerate kinase 1<br>/FL=gb:NM_000291.1                                                                                                                                                                                        | 6.22   | 3.79   | 2.52   | 4.17   | 1.09   | 9.04    | 13.35   | 9.77    | 10.72   | 1.33   | 2.57  | 1.68  | 4.61 *     |
| 200737_at    | PGK1: phosphoglycerate kinase 1                                                                                                                                                                                                                                                                                                                                                                                | NM_000291 | 5230                                                                                     |                                                                                                                                                                                                                                                                                                                                                                                                                                                                                                                                                                                                                                                           | 685.27 | 636.3  | 298.96 | 540.18 | 121.44 | 1443.32 | 1254.24 | 1088.39 | 1261.98 | 102.53 | 2.34  | 1.65  | 3.76 *     |
| 200806_s_at  | HSPD1: heat shock 60kDa protein 1 (chaperonin)                                                                                                                                                                                                                                                                                                                                                                 | BE256479  | 3329                                                                                     | gb:BE256479 /DB_XREF=gi:9126938 /DB_XREF=60111293F1 /CLONE=IMAGE:3352031 /FEA=FlmRNA /CNT=475<br>/TID=Hs.79037.0 /TIER=Stack /STK=15 /UG=Hs.79037 /LL=3329 /UG_GENE=HSPD1 /UG_TITLE=heat shock 60kD protein 1<br>(chaperonin) /FL=gb:NM_002156.1 /gb:M34664.1 /gb:M22382.1 /gb:BC003030.1<br>/gb:NM_004417.2 /DB_XREF=gi:7108342 /GEN=DUSP1 /FEA=FlmRNA /CNT=409 /TID=Hs.171695.0 /TIER=FL-Stack /STK=99<br>/UG=Hs.171695 /LL=1843 /DEF=Homo sapiens dual specificity phosphatase 1 (DUSP1), mRNA. /PROD=dual specificity<br>phosphatase 1 /FL=gb:NM_004417.2                                                                                             | 405.09 | 226.48 | 7.89   | 213.15 | 114.86 | 666.54  | 751.12  | 611.47  | 676.38  | 40.61  | 3.17  | 1.66  | 27.93 *    |
| 201041_s_at  | DUSP1: dual specificity phosphatase 1                                                                                                                                                                                                                                                                                                                                                                          | NM_004417 | 1843                                                                                     |                                                                                                                                                                                                                                                                                                                                                                                                                                                                                                                                                                                                                                                           | 319.21 | 572.26 | 251.02 | 380.83 | 97.72  | 1233.59 | 1147.31 | 706     | 1028.96 | 163.39 | 2.7   | 1.7   | 4.88 *     |
| 201120_s_at  | PGRMC1: progesterone receptor membrane component 1                                                                                                                                                                                                                                                                                                                                                             | AL547946  | 10857                                                                                    | gb:AL547946 /DB_XREF=gi:12882489 /DB_XREF=ALS47946 /CLONE=CSD0035YB22 (5 prime) /FEA=FlmRNA /CNT=357<br>/TID=Hs.90061.0 /TIER=Stack /STK=11 /UG=Hs.90061 /LL=10857 /UG_GENE=HPR6.6 /UG_TITLE=progesterone binding protein<br>/FL=gb:NM_006667.2                                                                                                                                                                                                                                                                                                                                                                                                           | 160.52 | 103.9  | 68.28  | 110.9  | 26.86  | 290.46  | 248.29  | 225.71  | 254.82  | 18.97  | 2.3   | 1.6   | 3.86 *     |
| 201474_s_at  | ITGA3: integrin, alpha 3 (antigen CD49c, alpha 3 subunit of VLA-3 receptor)                                                                                                                                                                                                                                                                                                                                    | NM_002204 | 3675                                                                                     | gb:NM_002204.1 /DB_XREF=gi:4504746 /GEN=ITGA3 /FEA=FlmRNA /CNT=350 /TID=Hs.265829.1 /TIER=FL-Stack /STK=65<br>/UG=Hs.265829 /LL=3675 /DEF=Homo sapiens integrin, alpha 3 (antigen CD49c, alpha 3 subunit of VLA-3 receptor) (ITGA3),<br>transcript variant 3, mRNA. /PROD=integrin alpha 3 isoform a precursor /FL=gb:NM_002204.1 /gb:M59911.1<br>/gb:NM_005627.2 /DB_XREF=gi:5032090 /GEN=SGK /FEA=FlmRNA /CNT=255 /TID=Hs.296323.0 /TIER=FL-Stack /STK=137<br>/UG=Hs.296323 /LL=6446 /DEF=Homo sapiens serumglucocorticoid regulated kinase (SGK), mRNA.<br>/PROD=serumglucocorticoid regulated kinase /FL=gb:BC001263.1 /gb:NM_005627.1 /gb:AF153609.1 | 75.16  | 75.51  | 94.19  | 81.62  | 6.29   | 27.48   | 37.69   | 47.18   | 37.45   | 5.69   | -2.18 | -1.68 | -2.97 *    |
| 201739_at    | SGK: serum/glucocorticoid regulated kinase                                                                                                                                                                                                                                                                                                                                                                     | NM_005627 | 6446                                                                                     |                                                                                                                                                                                                                                                                                                                                                                                                                                                                                                                                                                                                                                                           | 579.99 | 608.07 | 321.89 | 503.32 | 91.07  | 1076.37 | 1209.14 | 1135.44 | 1140.31 | 38.4   | 2.27  | 1.73  | 3.24 *     |
| 201792_at    | AEBP1: AE binding protein 1                                                                                                                                                                                                                                                                                                                                                                                    | NM_001129 | 165                                                                                      | gb:NM_001129.2 /DB_XREF=gi:4755145 /GEN=AEBP1 /FEA=FlmRNA /CNT=208 /TID=Hs.118397.0 /TIER=FL-Stack /STK=78<br>/UG=Hs.118397 /LL=165 /DEF=Homo sapiens AE-binding protein 1 (AEBP1), mRNA. /PROD=apoptose enhancer binding<br>protein 1 precursor /FL=gb:AF053944.1 /gb:NM_001129.2 /gb:D86479.1<br>/gb:U15174.1 /DB_XREF=gi:558845 /GEN=BNIP3 /FEA=FlmRNA /CNT=227 /TID=Hs.79428.0 /TIER=FL-Stack /STK=0 /UG=Hs.79428<br>/LL=664 /DEF=Homo sapiens BCL2adenovirus E1B 19kD-interacting protein 3 (BNIP3) mRNA, complete cds.<br>/PROD=BCL2adenovirus E1B 19kD-interacting protein 3 /FL=gb:AF02697.1 /gb:NM_004052.2 /gb:U15174.1                         | 208.91 | 251.11 | 240    | 233.34 | 12.63  | 128.92  | 104.94  | 125.75  | 119.87  | 7.52   | -1.95 | -1.7  | -2.24 *    |
| 201848_s_at  | BNIP3: BCL2adenovirus E1B 19kDa interacting protein 3                                                                                                                                                                                                                                                                                                                                                          | U15174    | 664                                                                                      |                                                                                                                                                                                                                                                                                                                                                                                                                                                                                                                                                                                                                                                           | 219.71 | 224.11 | 174.1  | 205.97 | 15.99  | 751.77  | 689.34  | 508.18  | 649.76  | 73.05  | 3.15  | 2.49  | 3.92 *     |
| 201858_s_at  | PRG1: proteoglycan 1, secretory granule                                                                                                                                                                                                                                                                                                                                                                        | J03223    | 5552                                                                                     | LL=5552 /UG_TITLE=proteoglycan 1, secretory granule /DEF=Human secretory granule proteoglycan peptide core mRNA,<br>complete cds. /FL=gb:J03223.1 /gb:NM_002721.3<br>/gb:AF138300.1 /DB_XREF=gi:5532410 /FEA=FlmRNA /CNT=238 /TID=Hs.76152.0 /TIER=FL-Stack /STK=11 /UG=Hs.76152<br>/LL=1634 /UG_GENE=DCN /DEF=Homo sapiens decorin variant A mRNA, complete cds. /PROD=decorin variant A<br>/FL=gb:NM_001920.1 /gb:AF138300.1 /gb:AF138304.1 /gb:M14219.1                                                                                                                                                                                                | 816.32 | 963.04 | 12.66  | 597.34 | 295.39 | 1794.16 | 1851.52 | 1614.42 | 1753.37 | 71.42  | 2.94  | 1.61  | 15.74 *    |
| 201893_x_at  | DCN: decorin                                                                                                                                                                                                                                                                                                                                                                                                   | AF138300  | 1634                                                                                     |                                                                                                                                                                                                                                                                                                                                                                                                                                                                                                                                                                                                                                                           | 167.16 | 606.3  | 285.7  | 353.05 | 131.17 | 2523.16 | 1002.88 | 954.55  | 1493.53 | 515.01 | 4.23  | 1.63  | 11.87 *    |
| 201896_s_at  | PSRC1: proline/serine-rich coiled-coil 1                                                                                                                                                                                                                                                                                                                                                                       | BC001425  | 84722                                                                                    | gb:BC001425.1 /DB_XREF=gi:12655140 /FEA=FlmRNA /CNT=233 /TID=Hs.77550.0 /TIER=FL-Stack /STK=11 /UG=Hs.77550 /LL=1163<br>/UG_GENE=CKS1 /DEF=Homo sapiens, Similar to differential display and activated by p53, clone MGC:1780, mRNA, complete<br>cds. /PROD=Similar to differential display and activated by p53 /FL=gb:BC001425.1 /gb:NM_001826.1 /gb:AF274941.1<br>/gb:AF279897.1                                                                                                                                                                                                                                                                       | 179.04 | 184.34 | 224.36 | 195.92 | 14.31  | 71.8    | 83.25   | 116.41  | 90.48   | 13.38  | -2.17 | -1.68 | -2.92 *    |
| 202129_s_at  | RIOK3: RIO kinase 3 (yeast) /// RIO kinase 3 (yeast)                                                                                                                                                                                                                                                                                                                                                           | AW006290  | 8780                                                                                     | gb:AW006290 /DB_XREF=gi:5855068 /DB_XREF=wg69H11.x1 /CLONE=IMAGE:2476557 /FEA=FlmRNA /CNT=160<br>/TID=Hs.209061.0 /TIER=Stack /STK=15 /UG=Hs.209061 /LL=8780 /UG_GENE=SUDD /UG_TITLE=suDD (suppressor of binD6,<br>Aspergillus nidulans) homolog /FL=gb:NM_003831.1 /gb:AF013591.1                                                                                                                                                                                                                                                                                                                                                                        | 43.44  | 31.28  | 9.93   | 28.22  | 9.79   | 83.49   | 84.37   | 65.47   | 77.78   | 6.16   | 2.76  | 1.71  | 6.46 *     |
| 202202_s_at  | LAMA4: laminin, alpha 4                                                                                                                                                                                                                                                                                                                                                                                        | NM_002290 | 3910                                                                                     | gb:NM_002290.2 /DB_XREF=gi:9845494 /GEN=LAMA4 /FEA=FlmRNA /CNT=195 /TID=Hs.78672.0 /TIER=FL-Stack /STK=3<br>/UG=Hs.78672 /LL=3910 /DEF=Homo sapiens laminin, alpha 4 (LAMA4), mRNA. /PROD=laminin, alpha 4 precursor<br>/FL=gb:NM_002290.2                                                                                                                                                                                                                                                                                                                                                                                                                | 82.98  | 80.63  | 33.64  | 65.75  | 16.07  | 189.38  | 150.84  | 244.7   | 194.97  | 27.24  | 2.97  | 1.93  | 5.14 *     |
| 202213_s_at  | CUL4B: cullin 4B                                                                                                                                                                                                                                                                                                                                                                                               | A1650819  | 8450                                                                                     | gb:A1650819 /DB_XREF=gi:4734798 /DB_XREF=wa95a10.x1 /CLONE=IMAGE:2303898 /FEA=FlmRNA /CNT=168<br>/TID=Hs.155976.0 /TIER=Stack /STK=10 /UG=Hs.155976 /LL=8450 /UG_GENE=CUL4B /UG_TITLE=cullin 4B /FL=gb:AB014595.1<br>/gb:NM_003588.1                                                                                                                                                                                                                                                                                                                                                                                                                      | 86.8   | 73.85  | 8.03   | 56.23  | 24.39  | 180.01  | 153.01  | 152.35  | 161.79  | 9.11   | 2.88  | 1.66  | 10.06 *    |
| 202241_at    | TRIB1: tribbles homolog 1 (Drosophila)                                                                                                                                                                                                                                                                                                                                                                         | NM_025195 | 10221                                                                                    | gb:NM_025195.1 /DB_XREF=gi:13399327 /GEN=CBFW /FEA=FlmRNA /CNT=184 /TID=Hs.7837.0 /TIER=FL-Stack /STK=96<br>/UG=Hs.7837 /LL=10221 /DEF=Homo sapiens phosphoprotein regulated by mitogenic pathways (CBFW), mRNA. /PROD=G-<br>protein-coupled receptor induced protein /FL=gb:U21847.1 /gb:NM_005655.1<br>/gb:NM_000900.1 /DB_XREF=gi:4505178 /GEN=MGP /FEA=FlmRNA /CNT=227 /TID=Hs.279009.0 /TIER=FL-Stack /STK=84<br>/UG=Hs.279009 /LL=4256 /DEF=Homo sapiens matrix Gla protein (MGP), mRNA. /PROD=matrix Gla protein<br>/FL=gb:NM_000900.1 /gb:M58549.1                                                                                                | 140.83 | 91.33  | 236.32 | 156.16 | 42.55  | 366.6   | 435.65  | 574.3   | 458.85  | 61.07  | 2.94  | 1.88  | 5.48 *     |
| 202291_s_at  | MGP: matrix Gla protein                                                                                                                                                                                                                                                                                                                                                                                        | NM_000900 | 4256                                                                                     |                                                                                                                                                                                                                                                                                                                                                                                                                                                                                                                                                                                                                                                           | 5.53   | 52.28  | 10.24  | 22.68  | 14.86  | 177.24  | 112.99  | 50.14   | 113.46  | 36.69  | 5     | 1.74  | 10000000 * |
| 202393_s_at  | KLF10: Kruppel-like factor 10                                                                                                                                                                                                                                                                                                                                                                                  | NM_005655 | 7071                                                                                     | gb:NM_005655.1 /DB_XREF=gi:5032176 /GEN=TIEG /FEA=FlmRNA /CNT=128 /TID=Hs.82173.0 /TIER=FL-Stack /STK=35<br>/UG=Hs.82173 /LL=7071 /DEF=Homo sapiens TGFb inducible early growth response (TIEG), mRNA. /PROD=TGFb inducible<br>early growth response /FL=gb:U21847.1 /gb:NM_005655.1<br>/gb:AL527430 /DB_XREF=gi:12790929 /DB_XREF=AL527430 /CLONE=CSD0021YF13 (5 prime) /FEA=FlmRNA /CNT=157<br>/TID=Hs.2006.0 /TIER=Stack /STK=54 /UG=Hs.2006 /LL=2947 /UG_GENE=GSTM3 /UG_TITLE=glutathione S-transferase M3<br>(brain) /FL=gb:NM_000849.1 /gb:BC008088.1 /gb:J05459.1                                                                                  | 549.43 | 651.34 | 613.34 | 604.7  | 29.73  | 2271.2  | 1905.78 | 2448.07 | 2208.35 | 159.67 | 3.65  | 3.15  | 4.2 *      |
| 202554_s_at  | GSTM3: glutathione S-transferase M3 (brain)                                                                                                                                                                                                                                                                                                                                                                    | AL527430  | 2947                                                                                     |                                                                                                                                                                                                                                                                                                                                                                                                                                                                                                                                                                                                                                                           | 895.02 | 905.05 | 663.9  | 821.32 | 78.76  | 523.5   | 190     | 313.63  | 342.38  | 97.34  | -2.4  | -1.57 | -4.57 *    |
| 202619_s_at  | PLOD2: procollagen-lysine, 2-oxoglutarate 5-dioxygenase 2                                                                                                                                                                                                                                                                                                                                                      | A1754404  | 5352                                                                                     | gb:A1754404 /DB_XREF=gi:5132668 /DB_XREF=cr24g06.x1 /CLONE=HBMSC_cr24g06 /FEA=FlmRNA /CNT=167<br>/TID=Hs.41270.0 /TIER=Stack /STK=20 /UG=Hs.41270 /UG_GENE=PLOD2 /UG_TITLE=procollagen-lysine, 2-<br>oxoglutarate 5-dioxygenase (lysine hydroxylase) 2 /FL=gb:NM_000935.1 /gb:U84573.1<br>/gb:NM_014456.1 /DB_XREF=gi:7653448 /GEN=PCDC4 /FEA=FlmRNA /CNT=138 /TID=Hs.296251.0 /TIER=FL-Stack /<br>UG=Hs.296251 /LL=2750 /DEF=Homo sapiens programmed cell death 4 (PCDC4), mRNA. /PROD=programmed cell death 4<br>/FL=gb:NM_014456.1 /gb:U96628.1                                                                                                        | 814.3  | 616.02 | 11.43  | 480.58 | 241.46 | 1410.07 | 1579.41 | 1299.99 | 1429.82 | 81.26  | 2.98  | 1.61  | 17.16 *    |
| 202730_s_at  | PCDC4: programmed cell death 4 (neoplastic transformation inhibitor)                                                                                                                                                                                                                                                                                                                                           | NM_014456 | 2750                                                                                     |                                                                                                                                                                                                                                                                                                                                                                                                                                                                                                                                                                                                                                                           | 47.58  | 34.09  | 15.06  | 32.24  | 9.43   | 93.12   | 87.93   | 57.63   | 79.56   | 11.07  | 2.47  | 1.54  | 4.89 *     |
| 202934_at    | HK2: hexokinase 2                                                                                                                                                                                                                                                                                                                                                                                              | A1761561  | 3099                                                                                     | gb:A1761561 /DB_XREF=gi:5177228 /DB_XREF=wi61h11.x1 /CLONE=IMAGE:2394789 /FEA=FlmRNA /CNT=127<br>/TID=Hs.198427.0 /TIER=Stack /STK=53 /UG=Hs.198427 /LL=3099 /UG_GENE=HK2 /UG_TITLE=hexokinase 2<br>/FL=gb:NM_000189.1 /gb:AF148513.1<br>/gb:NM_008871.1 /DB_XREF=gi:4534658 /GEN=IL1R1 /FEA=FlmRNA /CNT=156 /TID=Hs.82112.0 /TIER=FL-Stack /STK=49<br>/UG=Hs.82112 /LL=3554 /DEF=Homo sapiens interleukin 1 receptor, type 1 (IL1R1), mRNA. /PROD=interleukin 1 receptor, type<br>1 /FL=gb:NM_008871.1 /gb:M27492.1                                                                                                                                      | 139.39 | 160.98 | 90.6   | 130.32 | 20.82  | 247.53  | 302.51  | 279.83  | 276.62  | 15.95  | 2.12  | 1.65  | 2.91 *     |
| 202948_at    | IL1R1: interleukin 1 receptor, type 1                                                                                                                                                                                                                                                                                                                                                                          | NM_008871 | 3554                                                                                     |                                                                                                                                                                                                                                                                                                                                                                                                                                                                                                                                                                                                                                                           | 136.73 | 138.32 | 35.68  | 103.58 | 33.95  | 326.27  | 174.21  | 325.99  | 275.49  | 50.64  | 2.66  | 1.51  | 5.99 *     |
| 203015_s_at  | SSX2IP: synovial sarcoma, X breakpoint 2 interacting protein                                                                                                                                                                                                                                                                                                                                                   | AW136988  | 117178                                                                                   | gb:AW136988 /DB_XREF=gi:6141121 /DB_XREF=UI-H811-acu-b-04-0-UI.s1 /CLONE=IMAGE:2715582 /FEA=FlmRNA /CNT=165<br>/TID=Hs.22587.0 /TIER=Stack /STK=10 /UG=Hs.22587 /LL=22892 /UG_GENE=KIAA0923 /UG_TITLE=KIAA0923 protein<br>/FL=gb:AB023140.1 /gb:NM_014021.1<br>/gb:NM_006206.1 /DB_XREF=gi:5453869 /GEN=PDGFRA /FEA=FlmRNA /CNT=148 /TID=Hs.74615.0 /TIER=FL-Stack /STK=62<br>/UG=Hs.74615 /LL=5156 /DEF=Homo sapiens platelet-derived growth factor receptor, alpha polypeptide (PDGFRA), mRNA.<br>/PROD=platelet-derived growth factor receptor, alpha polypeptide /FL=gb:NM_006206.1 /gb:M21574.1                                                      | 8.55   | 6.77   | 5.69   | 7      | 0.84   | 11.52   | 13.77   | 16.67   | 13.99   | 1.49   | 2     | 1.54  | 2.62 *     |
| 203131_at    | PDGFRA: platelet-derived growth factor receptor, alpha polypeptide                                                                                                                                                                                                                                                                                                                                             | NM_006206 | 5156                                                                                     |                                                                                                                                                                                                                                                                                                                                                                                                                                                                                                                                                                                                                                                           | 219.29 | 299.5  | 208.35 | 243.38 | 28.73  | 865.86  | 488.65  | 929.41  | 761.31  | 137.56 | 3.14  | 2.12  | 4.41 *     |
| 203147_s_at  | TRIM14: tripartite motif-containing 14                                                                                                                                                                                                                                                                                                                                                                         | BE962483  | 9830                                                                                     | gb:BE962483 /DB_XREF=gi:11765431 /DB_XREF=601655782R1 /CLONE=IMAGE:3846116 /FEA=FlmRNA /CNT=97<br>/TID=Hs.179703.0 /TIER=Stack /STK=12 /UG=Hs.179703 /LL=9830 /UG_GENE=KIAA0129 /UG_TITLE=KIAA0129 gene product<br>/FL=gb:D50919.1 /gb:NM_014788.1<br>/gb:NM_005570.2 /DB_XREF=gi:10862689 /GEN=LMAN1 /FEA=FlmRNA /CNT=89 /TID=Hs.287912.0 /TIER=FL-Stack /STK=0<br>/UG=Hs.287912 /LL=3998 /DEF=Homo sapiens lectin, mannose-binding, 1 (LMAN1), mRNA. /PROD=lectin, mannose-binding, 1<br>precursor /FL=gb:NM_005570.2 /gb:U09716.1                                                                                                                      | 28.53  | 28.01  | 34.42  | 30.32  | 2.06   | 16.65   | 13.3    | 13.33   | 14.43   | 1.11   | -2.1  | -1.78 | -2.5 *     |
| 203293_s_at  | LMAN1: lectin, mannose-binding, 1                                                                                                                                                                                                                                                                                                                                                                              | NM_005570 | 3998                                                                                     |                                                                                                                                                                                                                                                                                                                                                                                                                                                                                                                                                                                                                                                           | 10.37  | 9.71   | 7.98   | 9.36   | 0.71   | 20.18   | 21.39   | 15.43   | 19      | 1.82   | 2.03  | 1.65  | 2.48 *     |
| 203423_at    | RBP1: retinol binding protein 1, cellular                                                                                                                                                                                                                                                                                                                                                                      | NM_002899 | 5947                                                                                     | gb:NM_002899.2 /DB_XREF=gi:8400726 /GEN=RBP1 /FEA=FlmRNA /CNT=125 /TID=Hs.101850.0 /TIER=FL-Stack /STK=72<br>/UG=Hs.101850 /LL=5947 /DEF=Homo sapiens retinol-binding protein 1, cellular (RBP1), mRNA. /PROD=retinol-binding protein<br>1, cellular /FL=gb:NM_002899.2 /gb:M11433.1                                                                                                                                                                                                                                                                                                                                                                      | 183.72 | 131.03 | 90.39  | 135.05 | 27.02  | 54.52   | 30.7    | 70.49   | 51.9    | 11.56  | -2.6  | -1.57 | -4.44 *    |



|             |                                                                                                                                         |           |       |                                                                                                                                                                                                                                                                                                                                                                                                                                                                                                                                                         |        |        |        |        |        |         |         |         |         |        |       |       |         |
|-------------|-----------------------------------------------------------------------------------------------------------------------------------------|-----------|-------|---------------------------------------------------------------------------------------------------------------------------------------------------------------------------------------------------------------------------------------------------------------------------------------------------------------------------------------------------------------------------------------------------------------------------------------------------------------------------------------------------------------------------------------------------------|--------|--------|--------|--------|--------|---------|---------|---------|---------|--------|-------|-------|---------|
| 206765_at   | KCNJ2: potassium inwardly-rectifying channel, subfamily 1, member 2                                                                     | AF153820  | 3759  | gb:AF153820.1/DB_XREF=gi:8132296/GEN=KCNJ2/FEA=FlmRNA/CNT=16/TID=Hs.1547.0/TIER=FL/STK=2/UG=Hs.1547/LL=3759/DEF=Homo sapiens inwardly-rectifying potassium channel Kir2.1 (KCNJ2) mRNA, complete cds. /PROD=inwardly-rectifying potassium channel Kir2.1 /FL=gb:U22413.1 gb:AF011904.1 gb:AF153820.1 gb:NM_000891.1 gb:U24055.1                                                                                                                                                                                                                         | 6,31   | 12,3   | 7,31   | 8,64   | 1,85   | 29,35   | 18,1    | 19,81   | 22,42   | 3,5    | 2,6   | 1,7   | 4,23 *  |
| 206796_at   | WISP1: WNT1 inducible signaling pathway protein 1                                                                                       | NM_003882 | 8840  | gb:NM_003882.1/DB_XREF=gi:4507920/GEN=WISP1/FEA=FlmRNA/CNT=8/TID=Hs.194680.0/TIER=FL/STK=0/UG=Hs.194680/LL=8840/DEF=Homo sapiens WNT1 inducible signaling pathway protein 1 (WISP1), mRNA. /PROD=WNT1 inducible signaling pathway protein 1 /FL=gb:NM_003882.1 gb:AF100779.1                                                                                                                                                                                                                                                                            | 66,08  | 90,74  | 24,49  | 60,44  | 19,33  | 183,08  | 210,88  | 166,83  | 186,93  | 12,86  | 3,09  | 1,99  | 6,56 *  |
| 207147_at   | DLX2: distal-less homeobox 2                                                                                                            | NM_004405 | 1746  | gb:NM_004405.2/DB_XREF=gi:6996003/GEN=DLX2/FEA=FlmRNA/CNT=7/TID=Hs.419.0/TIER=FL/STK=1/UG=Hs.419/LL=1746/DEF=Homo sapiens distal-less homeobox 2 (DLX2), mRNA. /PROD=distal-less homeobox 2 /FL=gb:NM_004405.2                                                                                                                                                                                                                                                                                                                                          | 17,98  | 11,01  | 14,55  | 14,52  | 2,01   | 218,48  | 87,66   | 152,98  | 153,04  | 37,76  | 10,54 | 6,05  | 16,19 * |
| 207316_at   | HAS1: hyaluronan synthase 1                                                                                                             | NM_001523 | 3036  | gb:NM_001523.1/DB_XREF=gi:4504338/GEN=HAS1/FEA=FlmRNA/CNT=8/TID=Hs.5769.0/TIER=FL/STK=2/UG=Hs.5769/LL=3036/DEF=Homo sapiens hyaluronan synthase 1 (HAS1), mRNA. /PROD=hyaluronan synthase 1 /FL=gb:U59269.1                                                                                                                                                                                                                                                                                                                                             | 159,01 | 504,79 | 164,5  | 276,1  | 114,36 | 1058,6  | 578,25  | 909,34  | 848,73  | 141,94 | 3,07  | 1,66  | 9,81 *  |
| 207495_at   | RAB28: RAB28, member RAS oncogene family                                                                                                | NM_004249 | 9364  | gb:NM_004249.1/DB_XREF=gi:4758993/GEN=RAB28/FEA=FlmRNA/CNT=5/TID=Hs.29637.0/TIER=FL/STK=0/UG=Hs.29637.1/LL=9364/DEF=Homo sapiens RAB28, member RAS oncogene family (RAB28), mRNA. /PROD=RAB28, member RAS oncogene family /FL=gb:NM_004249.1                                                                                                                                                                                                                                                                                                            | 7,98   | 9,61   | 4,73   | 7,44   | 1,43   | 14,51   | 15,96   | 14,43   | 14,97   | 0,5    | 2,01  | 1,52  | 2,95 *  |
| 207574_s_at | GADD45B: growth arrest and DNA-damage-inducible, beta                                                                                   | NM_015675 | 4616  | gb:NM_015675.1/DB_XREF=gi:9945331/GEN=GADD45B/FEA=FlmRNA/CNT=3/TID=Hs.110571.0/TIER=FL/STK=0/UG=Hs.110571/LL=4616/DEF=Homo sapiens growth arrest and DNA-damage-inducible, beta (GADD45B), mRNA. /PROD=GADD45B protein /FL=gb:NM_015675.1 gb:AF090950.1                                                                                                                                                                                                                                                                                                 | 318,6  | 436,47 | 775,31 | 510,13 | 136,89 | 1841,11 | 1475,01 | 2003,54 | 1773,22 | 156,3  | 3,48  | 2,33  | 6,3 *   |
| 207686_s_at | CASP8: caspase 8, apoptosis-related cysteine peptidase                                                                                  | NM_001228 | 841   | gb:NM_001228.1/DB_XREF=gi:4502582/GEN=CASP8/FEA=FlmRNA/CNT=3/TID=Hs.19949.0/TIER=FL/STK=0/UG=Hs.19949/LL=841/DEF=Homo sapiens caspase 8, apoptosis-related cysteine peptidase (CASP8), mRNA. /PROD=caspase 8, apoptosis-related cysteine peptidase /FL=gb:U60520.1 gb:NM_001228.1                                                                                                                                                                                                                                                                       | 18,13  | 10,52  | 9,83   | 12,83  | 2,66   | 27,27   | 33,44   | 22,9    | 27,87   | 3,06   | 2,17  | 1,52  | 3,39 *  |
| 207821_s_at | PTK2: PTK2 protein tyrosine kinase 2                                                                                                    | NM_005607 | 5747  | gb:NM_005607.1/DB_XREF=gi:5032000/GEN=PTK2/FEA=FlmRNA/CNT=3/TID=Hs.740.0/TIER=FL/STK=0/UG=Hs.740/LL=5747/DEF=Homo sapiens PTK2 protein tyrosine kinase 2 (PTK2), mRNA. /PROD=PTK2 protein tyrosine kinase 2 /FL=gb:NM_005607.1 gb:U5186.1                                                                                                                                                                                                                                                                                                               | 18,1   | 19,74  | 15,41  | 17,75  | 1,26   | 31,85   | 43,49   | 30,28   | 35,21   | 4,17   | 1,98  | 1,56  | 2,47 *  |
| 208047_s_at | NAB1: NGF-A binding protein 1 (EGF binding protein 1)                                                                                   | NM_005966 | 4664  | gb:NM_005966.1/DB_XREF=gi:5174604/GEN=NAB1/FEA=FlmRNA/CNT=2/TID=Hs.107474.0/TIER=FL/STK=0/UG=Hs.107474/LL=4664/DEF=Homo sapiens NGF-A binding protein 1 (ERG1 binding protein 1) (NAB1), mRNA. /PROD=NGF-A binding protein 1 (ERG1 binding protein 1) /FL=gb:U47007.1 gb:NM_005966.1                                                                                                                                                                                                                                                                    | 9,41   | 5,99   | 3,59   | 6,33   | 1,69   | 14,49   | 15,93   | 13,13   | 14,51   | 0,81   | 2,29  | 1,57  | 4,11 *  |
| 208394_x_at | ESM1: endothelial cell-specific molecule 1                                                                                              | NM_007036 | 11082 | gb:NM_007036.2/DB_XREF=gi:1325905/GEN=ESM1/FEA=FlmRNA/CNT=2/TID=Hs.41716.0/TIER=FL/STK=0/UG=Hs.41716/LL=11082/DEF=Homo sapiens endothelial cell-specific molecule 1 (ESM1), mRNA. /PROD=endothelial cell-specific molecule 1 precursor /FL=gb:NM_007036.2                                                                                                                                                                                                                                                                                               | 17,14  | 19,84  | 5,95   | 14,31  | 4,25   | 24,53   | 77,75   | 90,18   | 64,15   | 20,13  | 4,48  | 1,98  | 9,8 *   |
| 208510_s_at | PPARG: peroxisome proliferative activated receptor, gamma                                                                               | NM_015869 | 5468  | gb:NM_015869.1/DB_XREF=gi:7705548/GEN=PPARG/FEA=FlmRNA/CNT=4/TID=Hs.100724.1/TIER=FL/STK=0/UG=Hs.100724/LL=5468/DEF=Homo sapiens peroxisome proliferative activated receptor, gamma (PPARG), mRNA. /PROD=peroxisome proliferative activated receptor gamma, isoform 2 /FL=gb:NM_015869.1 gb:U63415.1 gb:D83233.1                                                                                                                                                                                                                                        | 16,83  | 19,86  | 22,38  | 19,69  | 1,6    | 47,97   | 31,74   | 47,01   | 42,24   | 5,26   | 2,15  | 1,65  | 2,72 *  |
| 208894_at   | HLA-DRA: major histocompatibility complex, class II, DR alpha /// major histocompatibility complex, class II, DR alpha                  | M60334    | 3122  | gb:U79012.1/DB_XREF=gi:188255/GEN=HLA-DRA/FEA=FlmRNA/CNT=470/TID=Hs.76807.0/TIER=FL/STK=0/UG=Hs.76807/LL=3122/DEF=Human MHC class II HLA-DR-alpha mRNA, complete cds. /PROD=cell surface glycoprotein /FL=gb:M60334.1                                                                                                                                                                                                                                                                                                                                   | 9,25   | 12,08  | 25,55  | 15,62  | 5,03   | 35,77   | 47,79   | 41,27   | 41,61   | 3,47   | 2,66  | 1,69  | 5,71 *  |
| 208937_s_at | ID1: inhibitor of DNA binding 1, dominant negative helix-loop-helix protein                                                             | D13889    | 3397  | gb:D13889.1/DB_XREF=gi:464181/GEN=ID1/FEA=FlmRNA/CNT=355/TID=Hs.75424.1/TIER=FL/STK=0/UG=Hs.75424/LL=3397/DEF=Human mRNA for id-1, complete cds. /PROD=id-1 /FL=gb:NM_002165.1 gb:BC000613.1 gb:D13889.1                                                                                                                                                                                                                                                                                                                                                | 227    | 250,32 | 515,28 | 330,87 | 92,45  | 1213,21 | 849,11  | 898,37  | 986,9   | 114,05 | 2,98  | 1,93  | 5,63 *  |
| 209086_x_at | MCAM: melanoma cell adhesion molecule                                                                                                   | BF964361  | 4162  | gb:BE964361/DB_XREF=gi:11767830/DB_XREF=60165806281/CLONE=IMAGE:3876255/FEA=FlmRNA/CNT=242/TID=Hs.211579.2/TIER=Stack/STK=14/UG=Hs.211579/LL=4162/UG_GENE=MCAM/UG_TITLE=melanoma adhesion molecule /FL=gb:AF08968.1 gb:NM_005500.1                                                                                                                                                                                                                                                                                                                      | 230,58 | 160,89 | 153,05 | 181,51 | 24,64  | 86,98   | 93,36   | 70,01   | 83,45   | 6,97   | -2,18 | -1,64 | -2,79 * |
| 209098_s_at | JAG1: jagged 1 (Alagille syndrome)                                                                                                      | U61276    | 182   | gb:U61276.1/DB_XREF=gi:1438936/GEN=JAG1/FEA=FlmRNA/CNT=199/TID=Hs.91143.0/TIER=FL/STK=0/UG=Hs.91143/LL=182/DEF=Human transmembrane protein Jagged 1 (HU1) mRNA, complete cds. /PROD=transmembrane protein Jagged 1 /FL=gb:AF003837.1 gb:U61276.1 gb:NM_000214.1 gb:U73936.1 gb:AF028593.1                                                                                                                                                                                                                                                               | 6,92   | 7,75   | 7,23   | 7,3    | 2,24   | 12,21   | 22,35   | 15,21   | 16,59   | 3,01   | 2,27  | 1,59  | 2,97 *  |
| 209189_at   | FOS: v-fos FBJ murine osteosarcoma viral oncogene homolog                                                                               | BC004490  | 2353  | gb:BC004490.1/DB_XREF=gi:13325363/FEA=FlmRNA/CNT=139/TID=Hs.25647.0/TIER=FL/STK=0/UG=Hs.25647/LL=2353/UG_GENE=FOS/DEF=Homo sapiens, v-fos FBJ murine osteosarcoma viral oncogene homolog, clone MGC:11074.1, mRNA, complete cds. /PROD=v-fos FBJ murine osteosarcoma viral oncogene homolog /FL=gb:NM_005252.2 gb:BC004490.1                                                                                                                                                                                                                            | 9,46   | 10,95  | 10,38  | 10,27  | 0,44   | 105,02  | 49,95   | 67,11   | 74,03   | 16,27  | 7,21  | 4,58  | 9,91 *  |
| 209204_at   | LMO4: LIM domain only 4                                                                                                                 | A1824831  | 8543  | gb:A1824831/DB_XREF=gi:5405502/GEN=LMO4/FEA=FlmRNA/CNT=175/TID=Hs.3844.0/TIER=Stack/STK=13/UG=Hs.3844/LL=8543/UG_GENE=LMO4/UG_TITLE=LIM domain only 4 /FL=gb:NM_006769.2 gb:U24576.1 gb:BC003600.1                                                                                                                                                                                                                                                                                                                                                      | 194,17 | 190,76 | 210,13 | 198,35 | 5,97   | 90,93   | 99,64   | 107,87  | 99,48   | 4,89   | -1,99 | -1,82 | -2,2 *  |
| 209355_s_at | PPAP2B: phosphatidic acid phosphatase type 2B                                                                                           | A8000889  | 8613  | gb:A8000889.1/DB_XREF=gi:2467299/FEA=FlmRNA/CNT=126/TID=Hs.331371.1/TIER=FL/Stack/STK=8/UG=Hs.331371/LL=8613/UG_GENE=PPAP2B/DEF=Homo sapiens mRNA for phosphatidic acid phosphatase 2b, complete cds. /PROD=phosphatidic acid phosphatase 2b /FL=gb:AF017786.1 gb:A8000889.1 gb:U79294.1                                                                                                                                                                                                                                                                | 102,08 | 123,88 | 91,36  | 105,77 | 9,57   | 421,95  | 181,92  | 323,74  | 309,2   | 69,67  | 2,92  | 1,81  | 4,17 *  |
| 209424_s_at | AMACR: alpha-methylacyl-CoA racemase                                                                                                    | A1796120  | 23600 | gb:A1796120/DB_XREF=gi:5261583/GEN=AMACR/FEA=FlmRNA/CNT=163/TID=Hs.128749.0/TIER=Stack/STK=9/UG=Hs.128749/LL=23600/UG_GENE=AMACR/UG_TITLE=alpha-methylacyl-CoA racemase /FL=gb:NM_014324.1 gb:AF047020.1 gb:AF158378.1                                                                                                                                                                                                                                                                                                                                  | 29,59  | 26,72  | 11,37  | 22,56  | 5,65   | 70,08   | 69,07   | 39,66   | 59,6    | 9,98   | 2,64  | 1,65  | 4,72 *  |
| 209676_at   | TFPI: tissue factor pathway inhibitor (lipoprotein-associated coagulation inhibitor)                                                    | J03225    | 7035  | gb:J03225.1/DB_XREF=gi:180545/GEN=TFPI/FEA=FlmRNA/CNT=91/TID=Hs.170279.0/TIER=FL/STK=1/UG=Hs.170279/LL=7035/UG_TITLE=tissue factor pathway inhibitor (lipoprotein-associated coagulation inhibitor) /DEF=Human lipoprotein-associated coagulation inhibitor mRNA, complete cds. /FL=gb:NM_006287.2 gb:J03225.1                                                                                                                                                                                                                                          | 5,99   | 6,46   | 4,76   | 5,74   | 0,51   | 24,57   | 27,91   | 13,84   | 22,11   | 4,24   | 3,85  | 2,58  | 5,29 *  |
| 209681_at   | SLC19A2: solute carrier family 19 (thiamine transporter), member 2                                                                      | AF153330  | 10560 | gb:AF153330.1/DB_XREF=gi:453325/GEN=TC1/FEA=FlmRNA/CNT=77/TID=Hs.30246.0/TIER=FL/Stack/STK=26/UG=Hs.30246/LL=10560/DEF=Homo sapiens thiamine carrier 1 (TC1) mRNA, complete cds. /PROD=thiamine carrier 1 /FL=gb:AF153488.1 gb:AF153330.1 gb:AF160812.1                                                                                                                                                                                                                                                                                                 | 65,04  | 46,49  | 2,87   | 38,13  | 18,43  | 103,52  | 117,12  | 99,48   | 106,71  | 5,33   | 2,8   | 1,55  | 13,64 * |
| 209706_at   | NKX3.1: NK3 transcription factor related, locus 1 (Drosophila)                                                                          | AF247704  | 4824  | gb:AF247704.1/DB_XREF=gi:9963969/FEA=FlmRNA/CNT=97/TID=Hs.55999.0/TIER=FL/Stack/STK=30/UG=Hs.55999/LL=4824/UG_GENE=NKX3A/DEF=Homo sapiens homeobox protein NKX3.1 mRNA, complete cds. /PROD=homeobox protein NKX3.1 /FL=gb:AF249672.1 gb:AF249670.1 gb:NM_006167.1 gb:U91540.1 gb:AF247704.1 gb:U80669.1                                                                                                                                                                                                                                                | 35,17  | 46,48  | 19,17  | 33,61  | 7,92   | 75,16   | 118,03  | 100,19  | 97,79   | 12,43  | 2,91  | 1,94  | 4,91 *  |
| 209728_at   | HLA-DRA: major histocompatibility complex, class II, DR beta 4 /// major histocompatibility complex, class II, DR beta 4                | BC005312  | 3126  | gb:BC005312.1/DB_XREF=gi:1352905/FEA=FlmRNA/CNT=84/TID=Hs.318720.0/TIER=FL/Stack/STK=31/UG=Hs.318720/DEF=Homo sapiens, clone MGC:12387, mRNA, complete cds. /PROD=Unknown (protein for MGC:12387) /FL=gb:M16942.1 gb:BC005312.1                                                                                                                                                                                                                                                                                                                         | 16,66  | 17,67  | 23,67  | 19,34  | 2,19   | 60,69   | 94,67   | 59,17   | 71,51   | 11,59  | 3,7   | 2,6   | 5,06 *  |
| 209763_at   | CHRD1: chordin-like 1                                                                                                                   | AL049176  | 91851 | gb:AL049176/DB_XREF=gi:4808226/FEA=FlmRNA/CNT=84/TID=Hs.82223.0/TIER=Stack/STK=46/UG=Hs.82223/LL=57803/UG_GENE=LOC57803/UG_TITLE=chordin-like /DEF=Human DNA sequence from clone 141HS on chromosome Xq22.1-23. Contains parts of a novel Chordin like protein with von Willebrand factor type C domains. Contains ESTs, STSs and GSSs /FL=gb:BC020909.1                                                                                                                                                                                                | 18,34  | 33,07  | 22,14  | 24,52  | 4,42   | 75,75   | 43,21   | 102,69  | 73,89   | 17,19  | 3,01  | 1,75  | 4,86 *  |
| 209960_at   | HGF: hepatocyte growth factor (hepatoietin A; scatter factor)                                                                           | X16323    | 3082  | gb:X16323.1/DB_XREF=gi:32081/FEA=FlmRNA/CNT=42/TID=Hs.809.0/TIER=Stack/STK=8/UG=Hs.809/LL=3082/UG_GENE=HGF/UG_TITLE=hepatocyte growth factor (hepatoietin A; scatter factor) /DEF=Human mRNA for hepatocyte growth factor (HGF) /FL=gb:M73240.1 gb:M73239.1 gb:M60718.1 gb:M29145.1                                                                                                                                                                                                                                                                     | 4,2    | 9,86   | 3,83   | 5,96   | 1,95   | 25,53   | 21,94   | 41,33   | 29,6    | 5,96   | 4,96  | 2,75  | 11,22 * |
| 209984_at   | JMJD2C: jumonji domain containing 2C                                                                                                    | AB037901  | 23081 | gb:AB037901.1/DB_XREF=gi:10567163/GEN=GASC-1/FEA=FlmRNA/CNT=24/TID=Hs.149918.0/TIER=FL/Stack/STK=10/UG=Hs.149918/LL=23081/UG_TITLE=gene amplified in squamous cell carcinoma 1; KIAA0780 protein /DEF=Homo sapiens GASC-1 mRNA, complete cds. /FL=gb:AB037901.1                                                                                                                                                                                                                                                                                         | 48,95  | 43,38  | 15,92  | 36,08  | 10,21  | 90,13   | 79,7    | 76,42   | 82,08   | 4,13   | 2,27  | 1,54  | 4,27 *  |
| 210148_at   | Fas-interacting serine/threonine kinase 3 (FIST3) mRNA, complete cds. /PROD=Fas-interacting serine/threonine kinase 3 /FL=gb:AF305239.1 | AF305239  |       | gb:AF305239.1/DB_XREF=gi:10998781/GEN=FIST3/FEA=FlmRNA/CNT=16/TID=Hs.30148.1/TIER=FL/STK=0/UG=Hs.30148/LL=10114/DEF=Homo sapiens Fas-interacting serine/threonine kinase 3 (FIST3) mRNA, complete cds. /PROD=Fas-interacting serine/threonine kinase 3 /FL=gb:AF305239.1                                                                                                                                                                                                                                                                                | 7,56   | 3,79   | 3,52   | 4,95   | 1,3    | 15,14   | 17,33   | 25,72   | 19,4    | 3,22   | 3,92  | 2,42  | 7,22 *  |
| 210284_s_at | MAP3K7IP2: mitogen-activated protein kinase kinase kinase 7 interacting protein 2                                                       | AF241230  | 23118 | gb:AF241230.1/DB_XREF=gi:7677465/FEA=FlmRNA/CNT=112/TID=Hs.109727.0/TIER=FL/STK=0/UG=Hs.109727/LL=23118/UG_GENE=KIAA0733/DEF=Homo sapiens TAK1-binding protein 2 mRNA, complete cds. /PROD=TAK1-binding protein 2 /FL=gb:AF241230.1                                                                                                                                                                                                                                                                                                                     | 62,73  | 34,38  | 21,68  | 39,6   | 12,13  | 107,59  | 116,53  | 86,83   | 103,65  | 8,8    | 2,62  | 1,69  | 5,39 *  |
| 212805_at   | KIAA0367: KIAA0367                                                                                                                      | AB002365  | 23273 | gb:AB002365.1/DB_XREF=gi:2224674/GEN=KIAA0367/FEA=FlmRNA/CNT=114/TID=Hs.23311.0/TIER=Stack/STK=49/UG=Hs.23311/LL=23273/UG_TITLE=KIAA0367 protein /DEF=Human mRNA for KIAA0367 gene, partial cds.                                                                                                                                                                                                                                                                                                                                                        | 21,76  | 35,7   | 25,98  | 27,82  | 4,13   | 101,3   | 56,26   | 54,62   | 70,73   | 15,29  | 2,54  | 1,56  | 3,85 *  |
| 212865_s_at | COL14A1: collagen, type XIV, alpha 1 (undulin)                                                                                          | BF449063  | 7373  | gb:BF449063/DB_XREF=gi:11515232/DB_XREF=706412.x1/CLONE=IMAGE:3579023/FEA=mRNA/CNT=105/TID=Hs.36131.0/TIER=Stack/STK=40/UG=Hs.36131/LL=7373/UG_GENE=COL14A1/UG_TITLE=collagen, type XIV, alpha 1 (undulin) /FL=gb:NM_004959.3/DB_XREF=gi:10443476/FEA=FlmRNA/CNT=57/TID=Hs.41143.0/TIER=Stack/STK=14/UG=Hs.41143/LL=23236/UG_GENE=KIAA0581/UG_TITLE=phosphoinositide-specific phospholipase C-beta 1 /DEF=Human DNA sequence from clone RP4-65447 on chromosome 20. Contains the gene for phospholipase C-beta 1 (KIAA0581, 1-phosphatidylinositol-4,5- | 8,3    | 21,74  | 4,69   | 11,58  | 5,19   | 32,1    | 31,72   | 30,27   | 31,36   | 0,56   | 2,71  | 1,56  | 10,31 * |
| 212322_at   | PLCB1: phospholipase C, beta 1 (phosphoinositide-specific)                                                                              | AL049593  | 23236 | gb:AL049593/DB_XREF=gi:10443476/FEA=FlmRNA/CNT=57/TID=Hs.41143.0/TIER=Stack/STK=14/UG=Hs.41143/LL=23236/UG_GENE=KIAA0581/UG_TITLE=phosphoinositide-specific phospholipase C-beta 1 /DEF=Human DNA sequence from clone RP4-65447 on chromosome 20. Contains the gene for phospholipase C-beta 1 (KIAA0581, 1-phosphatidylinositol-4,5-bisphosphate phosphodiesterase beta 1) (PLCB1, PLC-1), ESTs and GSSs /FL=gb:NM_015192.1                                                                                                                            | 20,01  | 26,02  | 6,13   | 17,39  | 5,89   | 60,31   | 42,52   | 42,99   | 48,61   | 5,85   | 2,8   | 1,7   | 6,41 *  |



|             |                                                                                                                                                                                                          |           |        |                                                                                                                                                                                                                                                                                                                                                                                              |        |        |         |        |        |        |        |        |        |       |       |       |         |
|-------------|----------------------------------------------------------------------------------------------------------------------------------------------------------------------------------------------------------|-----------|--------|----------------------------------------------------------------------------------------------------------------------------------------------------------------------------------------------------------------------------------------------------------------------------------------------------------------------------------------------------------------------------------------------|--------|--------|---------|--------|--------|--------|--------|--------|--------|-------|-------|-------|---------|
| 221268_s_at | SGPP1: sphingosine-1-phosphate phosphatase 1 // sphingosine-1-phosphate phosphatase 1                                                                                                                    | NM_030791 | 81537  | gb:NM_030791.1/DB_XREF=gi:13540568/GENE=LOC81537/FEA=FlmRNA/CNT=1/TID=HsAffx.90006534/TIER=FL/STK=0/DEF=Homo sapiens sphingosine-1-phosphatase [LOC81537].mRNA./PROD=sphingosine-1-phosphatase/FL=gb.NM_030791.1                                                                                                                                                                             | 74,39  | 46,42  | 5,74    | 42,19  | 19,93  | 147,51 | 162,69 | 145,92 | 152,04 | 5,35  | 3,6   | 2,02  | 16,17 * |
| 221423_s_at | YIPF5: Yip1 domain family, member 5 // Yip1 domain family, member 5                                                                                                                                      | NM_030799 | 81555  | gb:NM_030799.1/DB_XREF=gi:13540563/GENE=AF140225/FEA=FlmRNA/CNT=1/TID=HsAffx.90007107/TIER=FL/STK=0/DEF=Homo sapiens hypothetical protein AF140225 (AF140225).mRNA./PROD=hypothetical protein AF140225                                                                                                                                                                                       | 166,37 | 143,16 | 14,99   | 108,17 | 47,07  | 298,38 | 363,26 | 233,85 | 298,5  | 37,36 | 2,76  | 1,53  | 9,79 *  |
| 221428_s_at | TBL1XR1: transducin (beta)-like 1X-linked receptor 1 // transducin (beta)-like 1X-linked receptor 1                                                                                                      | NM_030921 | 79718  | gb:NM_030921.1/DB_XREF=gi:13569880/GENE=DC42/FEA=FlmRNA/CNT=1/TID=HsAffx.900115.1082/TIER=FL/STK=0/DEF=Homo sapiens hypothetical protein DC42 (DC42).mRNA./PROD=hypothetical protein DC42/FL=gb.NM_030921.1                                                                                                                                                                                  | 33,6   | 16,2   | 2,45    | 17,42  | 9,01   | 92,82  | 65,73  | 60,71  | 73,08  | 9,97  | 4,2   | 2,14  | 28,29 * |
| 221673_s_at | CSNK1G1: casein kinase 1, gamma 1                                                                                                                                                                        | AB042563  | 53944  | gb:AB042563.1/DB_XREF=gi:11177009/GENE=CSNK1G1/FEA=FlmRNA/CNT=1/TID=Hs.157777.1/TIER=FL/STK=0/UG=Hs.157777/LL=53944/DEF=Homo sapiens CSNK1G1 mRNA for casein kinase 1 gamma 1, complete cds./PROD=casein kinase 1 gamma 1/FL=gb:AB042563.1                                                                                                                                                   | 14,76  | 11,97  | 12,9    | 13,21  | 0,82   | 22,38  | 23,87  | 21,11  | 22,45  | 0,8   | 1,7   | 1,52  | 1,92 *  |
| 221814_at   | GPR124: G-protein-coupled receptor 124                                                                                                                                                                   | BF511315  | 25660  | gb:BF511315/DB_XREF=gi:11594613/DB_XREF=UI-H-810-aj-h-02-0-UI.s1/CLONE=IMAGE:3085275/FEA=mRNA/CNT=130/TID=Hs.17270.0/TIER=Stack/STK=9/UG=Hs.17270/LL=25960/UG_GENE=DKFZP434C211/UG_TITLE=DKFZP434C211 protein                                                                                                                                                                                | 137,88 | 135,81 | 130,28  | 137,66 | 1,01   | 76,35  | 69,01  | 79,88  | 75,08  | 3,2   | -1,83 | -1,71 | -1,97 * |
| 222162_s_at | ADAMTS1: ADAM metalloproteinase with thrombospondin type 1 motif, 1                                                                                                                                      | AK023795  | 9510   | gb:AK023795.1/DB_XREF=gi:10435838/FEA=mRNA/CNT=4/TID=Hs.8230.1/TIER=ConsEnd/STK=0/UG=Hs.8230/LL=9510/UG_GENE=ADAMTS1/UG_TITLE=a disintegrin-like and metalloprotease (reprolysin type) with thrombospondin type 1 motif, 1/DEF=Homo sapiens cDNA FL113233 fs, clone PLACE3000147, highly similar to Homo sapiens metalloproteinase with thrombospondin type 1 motifs ADAMTS1 (ADAMTS1) mRNA. | 235,16 | 280,15 | 35,2    | 183,5  | 75,28  | 595,22 | 718,02 | 674,3  | 662,52 | 35,93 | 3,61  | 2,13  | 11,12 * |
| 222890_at   | CCDC113: coiled-coil domain containing 113                                                                                                                                                               | BG054922  | 29070  | gb:BG054922/DB_XREF=gi:12512131/DB_XREF=na9c201.x1/CLONE=IMAGE:3441769/FEA=FlmRNA/CNT=36/TID=Hs.11614.0/TIER=Stack/STK=12/UG=Hs.11614/LL=29070/UG_GENE=HSPC065/UG_TITLE=HSPC065 protein                                                                                                                                                                                                      | 9,35   | 8,78   | 3,56    | 7,23   | 1,84   | 27,34  | 21,6   | 15,05  | 21,33  | 3,55  | 2,95  | 1,84  | 5,32 *  |
| 223611_s_at | LNK1: ligand of numb-protein X 1                                                                                                                                                                         | A1738919  | 84708  | gb:A1738919/DB_XREF=gi:5100900/DB_XREF=w12a04.x1/CLONE=IMAGE:2389998/FEA=FlmRNA/CNT=27/TID=Hs.66295.1/TIER=Stack/STK=12/UG=Hs.66295/LL=81608/UG_GENE=DKFZP586K0717/UG_TITLE=hypothetical protein DKFZP586K0717/FL=gb:A1738919                                                                                                                                                                | 11,5   | 17,25  | 7,53    | 12,09  | 2,82   | 36,27  | 32,02  | 27,72  | 32     | 2,47  | 2,65  | 1,86  | 4,35 *  |
| 223627_at   | RKHD3: ring finger and KH domain containing 3                                                                                                                                                            | AL136778  | 84206  | gb:AL136778.1/DB_XREF=gi:12053068/GENE=DKFZp434J0617/FEA=FlmRNA/CNT=27/TID=Hs.104744.0/TIER=FL/STK=0/UG=Hs.104744/DEF=Homo sapiens mRNA; cDNA DKFZp434J0617 (from clone DKFZp434J0617); complete cds.                                                                                                                                                                                        | 27,12  | 27,35  | 4,62    | 19,7   | 7,54   | 125,71 | 70,98  | 64,7   | 87,13  | 19,37 | 4,42  | 2,27  | 12,4 *  |
| 223735_at   | ARL6: ADP-ribosylation factor-like 6                                                                                                                                                                     | AL136815  | 84100  | gb:AL136815.1/DB_XREF=gi:12053140/GENE=DKFZp434L1123/FEA=FlmRNA/CNT=13/TID=Hs.182133.0/TIER=FL/STK=0/UG=Hs.182133/DEF=Homo sapiens mRNA; cDNA DKFZp434L1123 (from clone DKFZp434L1123); complete cds.                                                                                                                                                                                        | 6,93   | 6,02   | 2,18    | 5,04   | 1,45   | 14,47  | 13,09  | 9,43   | 12,33  | 1,51  | 2,44  | 1,56  | 4,75 *  |
| 223925_s_at | MTPN: Myotrophin                                                                                                                                                                                         | AF130088  | 136319 | gb:AF130088.1/DB_XREF=gi:11493480/FEA=FlmRNA/CNT=4/TID=Hs.21321.0/TIER=FL/STK=0/UG=Hs.21321/DEF=Homo sapiens clone FL89123 PR02474 mRNA, complete cds./PROD=PR02474/FL=gb:AF130088.1                                                                                                                                                                                                         | 26,95  | 13,8   | 7,43    | 16,06  | 5,75   | 46,4   | 47,74  | 44,55  | 46,23  | 0,93  | 2,88  | 1,81  | 7 *     |
| 224397_s_at | TMTCL1 // LOC553626: transmembrane and tetrapeptide repeat containing 1 // transmembrane and tetrapeptide repeat containing 1 // similar to ARG99 protein // similar to ARG99 protein                    | AF319520  | 83857  | gb:AF319520.1/DB_XREF=gi:13604166/FEA=FlmRNA/CNT=1/TID=HsAffx.900593.486/TIER=FL/STK=0/DEF=Homo sapiens ARG99 mRNA, complete cds./PROD=ARG99/FL=gb:AF319520.1                                                                                                                                                                                                                                | 18,41  | 16,55  | 10,99   | 15,32  | 2,23   | 72,81  | 61,67  | 55,49  | 63,32  | 5,07  | 4,13  | 3,2   | 5,57 *  |
| 225016_at   | APCDD1: adenomatosis polyposis coli down-regulated 1                                                                                                                                                     | N48299    | 147495 | gb:N48299/DB_XREF=gi:1189465/DB_XREF=yy71103.x1/CLONE=IMAGE:279595/FEA=EST/CNT=126/TID=Hs.20665.0/TIER=Stack/STK=61/UG=Hs.20665/UG_TITLE=ESTs, Moderately similar to NPY-C (H.sapiens)                                                                                                                                                                                                       | 54,2   | 28,09  | 35,46   | 39,25  | 7,77   | 13,58  | 8,53   | 16,78  | 12,96  | 2,4   | -3,03 | -1,89 | -4,79 * |
| 225420_at   | GPAM: glycerol-3-phosphate acyltransferase, mitochondrial                                                                                                                                                | AV699379  | 57678  | gb:AV699379/DB_XREF=gi:10301350/DB_XREF=AV699379/CLONE=GKCFVD06/FEA=mRNA/CNT=120/TID=Hs.42586.0/TIER=Stack/STK=13/UG=Hs.42586/LL=57678/UG_GENE=KIAA1560/UG_TITLE=KIAA1560 protein                                                                                                                                                                                                            | 69,53  | 47,4   | 4,57    | 40,5   | 19,07  | 178,05 | 153,65 | 106,67 | 146,12 | 20,95 | 3,61  | 1,9   | 16,12 * |
| 225429_at   | gb:BF437011/DB_XREF=gi:11449329/DB_XREF=7p61e06.x1/CLONE=IMAGE:3653087/FEA=EST/CNT=101/TID=Hs.7256.1/TIER=Stack/STK=29/UG=Hs.7256/LL=23592/UG_GENE=MAM1/UG_TITLE=integral inner nuclear membrane protein | BF437011  |        | gb:BF437011/DB_XREF=gi:11449329/DB_XREF=7p61e06.x1/CLONE=IMAGE:3653087/FEA=EST/CNT=101/TID=Hs.7256.1/TIER=Stack/STK=29/UG=Hs.7256/LL=23592/UG_GENE=MAM1/UG_TITLE=integral inner nuclear membrane protein                                                                                                                                                                                     | 24,74  | 19,06  | 5,55    | 16,45  | 5,69   | 41,41  | 48,02  | 46,23  | 45,22  | 1,97  | 2,75  | 1,74  | 6,39 *  |
| 225496_s_at | SYTL2: synaptotagmin-like 2                                                                                                                                                                              | N21426    | 54843  | gb:N21426/DB_XREF=gi:1126596/DB_XREF=xy80801.x1/CLONE=IMAGE:265921/FEA=mRNA/CNT=96/TID=Hs.92254.1/TIER=Stack/STK=20/UG=Hs.92254/LL=54843/UG_GENE=FLJ20163/UG_TITLE=hypothetical protein FLJ20163                                                                                                                                                                                             | 17,34  | 22,09  | 10,87   | 16,77  | 3,25   | 90,35  | 29,78  | 53,25  | 57,79  | 17,63 | 3,45  | 1,64  | 6,03 *  |
| 225602_at   | C9orf19: chromosome 9 open reading frame 19                                                                                                                                                              | H92988    | 152007 | gb:H92988/DB_XREF=gi:1099316/DB_XREF=yy07d05.s1/CLONE=IMAGE:242025/FEA=EST/CNT=142/TID=Hs.75544.1/TIER=Stack/STK=93/UG=Hs.75544/LL=7533/UG_GENE=VWHAH/UG_TITLE=tyrosine 3-mono-oxygenase/tryptophan 5-mono-oxygenase activation protein, eta polypeptide                                                                                                                                     | 172,07 | 191,14 | 182,5   | 181,9  | 5,51   | 80,71  | 88,8   | 107,78 | 92,43  | 8,02  | -1,97 | -1,71 | -2,31 * |
| 226034_at   | Homo sapiens, clone IMAGE:3881549, mRNA                                                                                                                                                                  | BE222344  |        | gb:BE222344/DB_XREF=gi:890962/DB_XREF=ms10g08.x1/CLONE=IMAGE:3166238/FEA=EST/CNT=70/TID=Hs.166975.4/TIER=Stack/STK=24/UG=Hs.166975/LL=6430/UG_GENE=SRFS5/UG_TITLE=splicing factor, arginine/serine-rich 5                                                                                                                                                                                    | 14,31  | 16,91  | 5       | 12,07  | 3,62   | 35,05  | 28,49  | 33,57  | 32,37  | 1,99  | 2,68  | 1,77  | 5,31 *  |
| 226650_at   | ZFAND2A: zinc finger, AN1-type domain 2A                                                                                                                                                                 | A1984061  | 90637  | gb:A1984061/DB_XREF=gi:5811280/DB_XREF=w256a07.x1/CLONE=IMAGE:2562036/FEA=EST/CNT=37/TID=Hs.116567.0/TIER=Stack/STK=25/UG=Hs.116567/UG_TITLE=ESTs, Weakly similar to predicted using GeneFinder (C.elegans)                                                                                                                                                                                  | 123,13 | 237,03 | 71,54   | 143,9  | 48,89  | 404,96 | 411,12 | 285,93 | 367,34 | 40,74 | 2,55  | 1,56  | 5,86 *  |
| 227300_at   | TMEM119: transmembrane protein 119                                                                                                                                                                       | AL521682  | 338773 | gb:AL521682/DB_XREF=gi:12785175/DB_XREF=AL521682/CLONE=CSD08003HY17 (3 prime)/FEA=EST/CNT=42/TID=Hs.93135.0/TIER=Stack/STK=97/UG=Hs.93135/UG_TITLE=ESTs, Weakly similar to ALU2_HUMAN ALU SUBFAMILY SB SEQUENCE CONTAMINATION WARNING ENTRY (H.sapiens)                                                                                                                                      | 562,71 | 597,18 | 1729,11 | 963    | 383,19 | 194,14 | 155,27 | 298,37 | 215,93 | 42,72 | -4,46 | -1,5  | -8,48 * |
| 227655_at   | CDNA FLJ38512 fs, clone HCHON2000503                                                                                                                                                                     | A1631964  |        | gb:A1631964/DB_XREF=gi:4683294/DB_XREF=wa38303.x1/CLONE=IMAGE:2300356/FEA=EST/CNT=33/TID=Hs.34447.0/TIER=Stack/STK=30/UG=Hs.34447/UG_TITLE=ESTs                                                                                                                                                                                                                                              | 235,5  | 243,38 | 239,81  | 239,56 | 2,28   | 126,42 | 121,98 | 121,78 | 123,39 | 1,51  | -1,94 | -1,89 | -1,99 * |
| 227819_at   | IGR6: leucine-rich repeat-containing G-protein-coupled receptor 6                                                                                                                                        | AA524536  | 59352  | gb:AA524536/DB_XREF=gi:2265464/DB_XREF=ng4d903.s1/CLONE=IMAGE:937780/FEA=mRNA/CNT=32/TID=Hs.59483.0/TIER=Stack/STK=17/UG=Hs.59483/UG_TITLE=Homo sapiens VTS20631 mRNA, g-protein coupled receptor family, par1 cds                                                                                                                                                                           | 25,84  | 24,47  | 29,22   | 26,51  | 1,41   | 12,9   | 15,55  | 15,33  | 14,59  | 0,85  | -1,82 | -1,6  | -2,07 * |
| 228303_at   | acetylglucosaminyltransferase 6; GalNAc transferase 6; UDP-GalNAc:polypeptide N-acetylglucosaminyltransferase 6; protein-UDP acetylglucosaminyltransferase 6 [Homo sapiens]                              | AW014155  |        | gb:AW014155/DB_XREF=gi:5862912/DB_XREF=UI-H-810-aj-c-11-0-UI.s1/CLONE=IMAGE:2709501/FEA=EST/CNT=18/TID=Hs.20726.0/TIER=Stack/STK=15/UG=Hs.20726/UG_TITLE=ESTs                                                                                                                                                                                                                                | 87,52  | 52,57  | 59,96   | 66,68  | 10,64  | 18,76  | 35,92  | 24,79  | 26,49  | 5,03  | -2,52 | -1,68 | -3,9 *  |
| 228802_at   | RBPM5: RNA binding protein with multiple splicing 2                                                                                                                                                      | BE348466  | 348093 | gb:BE348466/DB_XREF=gi:9260319/DB_XREF=ih69c12.x1/CLONE=IMAGE:3151990/FEA=EST/CNT=19/TID=Hs.78293.0/TIER=Stack/STK=14/UG=Hs.78293/UG_TITLE=ESTs                                                                                                                                                                                                                                              | 128,27 | 144,85 | 91,26   | 121,46 | 15,84  | 67,85  | 36,98  | 63,5   | 56,11  | 9,65  | -2,16 | -1,53 | -3,18 * |
| 22885_at    | MAMDC2: MAM domain containing 2                                                                                                                                                                          | A1862120  | 256691 | gb:A1862120/DB_XREF=gi:5526227/DB_XREF=tw37a12.x1/CLONE=IMAGE:2261854/FEA=EST/CNT=18/TID=Hs.131987.0/TIER=Stack/STK=8/UG=Hs.131987/UG_TITLE=ESTs                                                                                                                                                                                                                                             | 31,08  | 20,1   | 5,84    | 19,01  | 7,31   | 56,59  | 146,63 | 55,73  | 86,32  | 30,16 | 4,54  | 1,72  | 13,42 * |
| 229074_at   | Transcribed locus                                                                                                                                                                                        | A1692267  |        | gb:A1692267/DB_XREF=gi:4969607/DB_XREF=wc83403.x1/CLONE=IMAGE:2325221/FEA=EST/CNT=13/TID=Hs.150073.0/TIER=Stack/STK=9/UG=Hs.150073/UG_TITLE=ESTs, Moderately similar to alternatively spliced product using exon 13A (H.sapiens)                                                                                                                                                             | 215,66 | 362,29 | 289,13  | 289,02 | 42,33  | 106,08 | 166,36 | 141,28 | 137,91 | 17,48 | -2,1  | -1,5  | -2,88 * |
| 229308_at   | Transcribed locus                                                                                                                                                                                        | AW273796  |        | gb:AW273796/DB_XREF=gi:6660826/DB_XREF=xx24a05.x1/CLONE=IMAGE:2814032/FEA=EST/CNT=20/TID=Hs.42500.1/TIER=Stack/STK=16/UG=Hs.42500/LL=26225/UG_GENE=ARL5/UG_TITLE=ADP-ribosylation factor-like 5                                                                                                                                                                                              | 8,92   | 11,8   | 3,32    | 8,01   | 2,49   | 30,04  | 29,06  | 24,78  | 27,96  | 1,62  | 3,49  | 2,28  | 7,17 *  |
| 229500_at   | gb:A1609256/DB_XREF=gi:4618423/DB_XREF=tw83e12.x1/CLONE=IMAGE:2266318/FEA=EST/CNT=13/TID=Hs.270956.1/TIER=Stack/STK=9/UG=Hs.270956/LL=10463/UG_GENE=CAORF1/UG_TITLE=chromosome 4 open reading frame 1    | A1609256  |        | gb:A1609256/DB_XREF=gi:4618423/DB_XREF=tw83e12.x1/CLONE=IMAGE:2266318/FEA=EST/CNT=13/TID=Hs.270956.1/TIER=Stack/STK=9/UG=Hs.270956/LL=10463/UG_GENE=CAORF1/UG_TITLE=chromosome 4 open reading frame 1                                                                                                                                                                                        | 14,71  | 13,36  | 2,94    | 10,34  | 3,72   | 32,47  | 30,54  | 30,59  | 31,2   | 0,64  | 3,02  | 1,89  | 7,4 *   |
| 229802_at   | CDNA FLJ14388 fs, clone HEMBA1002716                                                                                                                                                                     | AA147884  |        | gb:AA147884/DB_XREF=gi:1717300/DB_XREF=z50b04.s1/CLONE=IMAGE:505327/FEA=EST/CNT=13/TID=Hs.9812.0/TIER=Stack/STK=8/UG=Hs.9812/UG_TITLE=ESTs                                                                                                                                                                                                                                                   | 130,84 | 180,89 | 6,38    | 106,04 | 51,88  | 580,55 | 454,82 | 397,69 | 477,69 | 54,01 | 4,5   | 2,4   | 23,17 * |
| 230542_at   | ZNF597: zinc finger protein 597                                                                                                                                                                          | A1825587  | 146434 | gb:A1825587/DB_XREF=gi:5462658/DB_XREF=wa94b10.x1/CLONE=IMAGE:2311387/FEA=EST/CNT=13/TID=Hs.88630.0/TIER=Stack/STK=8/UG=Hs.88630/UG_TITLE=ESTs, Weakly similar to T14748 hypothetical protein DKFZp434G1621.1 (H.sapiens)                                                                                                                                                                    | 8,2    | 6,27   | 3,79    | 6,09   | 1,28   | 14,97  | 12,26  | 16,57  | 14,6   | 1,26  | 2,4   | 1,72  | 3,73 *  |
| 230710_at   | CDNA FLJ14489 fs, clone BRTHA2004582                                                                                                                                                                     | W05495    |        | gb:W05495/DB_XREF=gi:1278246/DB_XREF=zaa81b10.r1/CLONE=IMAGE:298939/FEA=EST/CNT=8/TID=Hs.218710.0/TIER=Stack/STK=8/UG=Hs.218710/UG_TITLE=ESTs                                                                                                                                                                                                                                                | 20,46  | 32,82  | 30,61   | 27,96  | 3,8    | 86,08  | 63,82  | 56,58  | 68,83  | 8,87  | 2,46  | 1,8   | 3,38 *  |
| 231055_at   | Transcribed locus                                                                                                                                                                                        | BF432941  |        | gb:BF432941/DB_XREF=gi:11445104/DB_XREF=7n28g07.x1/CLONE=IMAGE:3566028/FEA=EST/CNT=13/TID=Hs.263462.0/TIER=Stack/STK=10/UG=Hs.263462/UG_TITLE=ESTs                                                                                                                                                                                                                                           | 11,7   | 8,74   | 7,87    | 9,44   | 1,16   | 16,32  | 17,31  | 23,19  | 18,94  | 2,15  | 2,01  | 1,52  | 2,66 *  |
| 231292_at   | EID3: E1A-like inhibitor of differentiation 3                                                                                                                                                            | A1964053  | 493861 | gb:A1964053/DB_XREF=gi:5756765/DB_XREF=gi:5756765/CLONE=IMAGE:2514547/FEA=EST/CNT=8/TID=Hs.170337.0/TIER=Stack/STK=8/UG=Hs.170337/UG_TITLE=ESTs                                                                                                                                                                                                                                              | 6,56   | 7,25   | 6,94    | 6,91   | 0,2    | 12,62  | 12,54  | 18,82  | 14,66  | 2,08  | 2,12  | 1,62  | 2,63 *  |
| 233512_at   | Clone 23571 and 23784 mRNA sequence                                                                                                                                                                      | AF035291  |        | gb:AF035291.1/DB_XREF=gi:2661045/FEA=mRNA/CNT=3/TID=Hs.113744.0/TIER=ConsEnd/STK=2/UG=Hs.113744/UG_TITLE=Homo sapiens clone 23571 and 23784 mRNA sequence/DEF=Homo sapiens clone 23571 and 23784 mRNA sequence.                                                                                                                                                                              | 10,07  | 8,59   | 9,94    | 9,53   | 0,47   | 35,77  | 43,02  | 28,68  | 35,82  | 4,14  | 3,76  | 3     | 4,56 *  |
| 233775_x_at | CDNA FLJ13242 fs, clone OVARC1000578                                                                                                                                                                     | AK023304  |        | gb:AK023304.1/DB_XREF=gi:10435181/FEA=mRNA/CNT=2/TID=Hs.296731.0/TIER=ConsEnd/STK=0/UG=Hs.296731/UG_TITLE=Homo sapiens cDNA FLJ13242 fs, clone OVARC1000578/DEF=Homo sapiens cDNA FLJ13242 fs, clone OVARC1000578.                                                                                                                                                                           | 143,18 | 142,3  | 170,52  | 152    | 9,26   | 81,99  | 92,74  | 93,52  | 89,42  | 3,72  | -1,7  | -1,5  | -1,91 * |
| 234975_at   | CDNA FLJ38048 fs, clone CTONG2014264 // CDNA FLJ39067 fs, clone NT2RP014910                                                                                                                              | BE544748  |        | gb:BE544748/DB_XREF=gi:9773393/DB_XREF=601075513F1/CLONE=IMAGE:3461475/FEA=EST/CNT=35/TID=Hs.10592.0/TIER=ConsEnd/STK=0/UG=Hs.10592/UG_TITLE=ESTs                                                                                                                                                                                                                                            | 6,47   | 4,91   | 3,85    | 5,08   | 0,76   | 12,62  | 11,85  | 10,36  | 11,61  | 0,67  | 2,29  | 1,8   | 3,07 *  |

|           |                                                                                                                                                    |          |        |                                                                                                                                                                                                                               |        |        |       |        |       |        |        |        |        |       |      |      |        |
|-----------|----------------------------------------------------------------------------------------------------------------------------------------------------|----------|--------|-------------------------------------------------------------------------------------------------------------------------------------------------------------------------------------------------------------------------------|--------|--------|-------|--------|-------|--------|--------|--------|--------|-------|------|------|--------|
| 235182_at | C2orf82: chromosome 20 open reading frame 82                                                                                                       | AI816793 | 140862 | gb:A1816793/DB_XREF=gi:5435872/DB_XREF=wj34b11.x1/CLONE=IMAGE:2404701/FEA=EST/CNT=13/TID=Hs.135100.0/TIER=ConsEnd/STK=4/UG=Hs.135100/UG_TITLE=ESTs                                                                            | 7,53   | 7,23   | 7,32  | 7,36   | 0,09  | 48,48  | 18,57  | 25,34  | 30,79  | 9,05  | 4,19 | 2,16 | 6,21*  |
| 235276_at | gb:AA781795/DB_XREF=gi:2841126/DB_XREF=ai51d05.x1/CLONE=1360521/FEA=EST/CNT=14/TID=Hs.122587.0/TIER=ConsEnd/STK=1/UG=Hs.122587/UG_TITLE=ESTs       | AA781795 |        | gb:AA781795/DB_XREF=gi:2841126/DB_XREF=ai51d05.x1/CLONE=1360521/FEA=EST/CNT=14/TID=Hs.122587.0/TIER=ConsEnd/STK=1/UG=Hs.122587/UG_TITLE=ESTs                                                                                  | 13,91  | 17,31  | 8,86  | 13,36  | 2,45  | 64,15  | 20,21  | 54,52  | 46,29  | 13,33 | 3,47 | 1,74 | 5,88*  |
| 235606_at | LOC344595: hypothetical LOC344595                                                                                                                  | AA417117 | 344595 | gb:AA417117/DB_XREF=gi:2077402/DB_XREF=zu0703.r1/CLONE=IMAGE:7311165/FEA=EST/CNT=9/TID=Hs.122643.0/TIER=ConsEnd/STK=0/UG=Hs.122643/UG_TITLE=ESTs                                                                              | 14,95  | 15,99  | 5,24  | 12,06  | 3,42  | 33,66  | 29,45  | 22,87  | 28,66  | 3,14  | 2,38 | 1,54 | 4,54*  |
| 235683_at | SES3: sestrin 3                                                                                                                                    | BF685808 | 143686 | gb:BF685808/DB_XREF=gi:11971216/DB_XREF=602140491F1/CLONE=IMAGE:4301567/FEA=EST/CNT=13/TID=Hs.132927.0/TIER=ConsEnd/STK=0/UG=Hs.132927/UG_TITLE=ESTs, Moderately similar to p53 regulated PA26-T2 nuclear protein (H.sapiens) | 15,6   | 21,15  | 23,68 | 20,14  | 2,39  | 70,69  | 52,22  | 29,34  | 50,75  | 11,96 | 2,52 | 1,5  | 3,74*  |
| 235821_at | CDNA FLJ14388 fis, clone HEMBA1002716                                                                                                              | AI917494 |        | gb:AI917494/DB_XREF=gi:5637349/DB_XREF=ts84f07.x1/CLONE=IMAGE:2237989/FEA=EST/CNT=9/TID=Hs.131329.0/TIER=ConsEnd/STK=7/UG=Hs.131329/UG_TITLE=ESTs                                                                             | 89,95  | 116,16 | 25,18 | 77,1   | 27,04 | 288,06 | 284,5  | 248,9  | 273,82 | 12,5  | 3,55 | 2,24 | 8,41*  |
| 235882_at | CDNA clone IMAGE:5303499                                                                                                                           | BF115777 |        | gb:BF115777/DB_XREF=gi:10985253/DB_XREF=7h64f1.x1/CLONE=IMAGE:3569444/FEA=EST/CNT=12/TID=Hs.148185.0/TIER=ConsEnd/STK=3/UG=Hs.148185/UG_TITLE=ESTs                                                                            | 15,19  | 13,9   | 12,24 | 13,78  | 0,86  | 22,76  | 29,38  | 25,05  | 25,73  | 1,94  | 1,87 | 1,58 | 2,19*  |
| 236480_at | CDNA FLJ1489 fis, clone BRTHA2004582                                                                                                               | AA543084 |        | gb:AA543084/DB_XREF=gi:2291564/DB_XREF=n96g04.s1/CLONE=IMAGE:927798/FEA=EST/CNT=6/TID=Hs.154077.0/TIER=ConsEnd/STK=5/UG=Hs.154077/UG_TITLE=ESTs                                                                               | 7,19   | 9,97   | 7,85  | 8,34   | 0,84  | 22,35  | 19,54  | 20,1   | 20,66  | 0,86  | 2,48 | 2,09 | 3,01*  |
| 236835_at | LOC645431: hypothetical protein LOC645431                                                                                                          | AI654093 | 645431 | gb:AI654093/DB_XREF=gi:4738072/DB_XREF=tv61f08.x1/CLONE=IMAGE:2283591/FEA=EST/CNT=5/TID=Hs.43397.0/TIER=ConsEnd/STK=5/UG=Hs.43397/UG_TITLE=ESTs, Weakly similar to T43458 hypothetical protein DKFZp434F0621.1 (H.sapiens)    | 9,69   | 10,22  | 4,99  | 8,3    | 1,66  | 19,61  | 17,11  | 18,7   | 18,47  | 0,73  | 2,23 | 1,66 | 3,33*  |
| 238332_at | ANKRD29: ankyrin repeat domain 29                                                                                                                  | AI307802 | 147463 | gb:AI307802/DB_XREF=gi:4002406/DB_XREF=tb28c10.x1/CLONE=IMAGE:2055666/FEA=EST/CNT=23/TID=Hs.135560.0/TIER=ConsEnd/STK=4/UG=Hs.135560/UG_TITLE=ESTs, Weakly similar to T43458 hypothetical protein DKFZp434F0621.1 (H.sapiens) | 16,09  | 53,76  | 14,23 | 28,03  | 12,88 | 123,15 | 109,98 | 92,94  | 108,69 | 8,75  | 3,88 | 2,16 | 15,94* |
| 238455_at | CDNA FLJ45742 fis, clone KIDNE2016327                                                                                                              | AA329676 |        | gb:AA329676/DB_XREF=gi:1981918/DB_XREF=EST33315/FEA=EST/CNT=12/TID=Hs.72639.0/TIER=ConsEnd/STK=0/UG=Hs.72639/UG_TITLE=ESTs                                                                                                    | 21,83  | 11,63  | 3,49  | 12,31  | 5,31  | 47,28  | 30,61  | 32,03  | 36,64  | 5,34  | 2,98 | 1,62 | 10,34* |
| 238465_at | MGC33648: hypothetical protein MGC33648                                                                                                            | AI265933 | 133383 | gb:AI265933/DB_XREF=gi:3884091/DB_XREF=naq90e10.x1/CLONE=IMAGE:1938666/FEA=EST/CNT=12/TID=Hs.85950.0/TIER=ConsEnd/STK=1/UG=Hs.85950/UG_TITLE=ESTs                                                                             | 58,93  | 17,16  | 6,81  | 27,63  | 15,93 | 80,38  | 91,84  | 76,08  | 82,77  | 4,7   | 3    | 1,52 | 58,01* |
| 238623_at | CDNA FLJ37310 fis, clone BRAMY2016706                                                                                                              | AI633559 |        | gb:AI633559/DB_XREF=gi:4684889/DB_XREF=th6f02.x1/CLONE=IMAGE:2123835/FEA=EST/CNT=9/TID=Hs.310359.0/TIER=ConsEnd/STK=0/UG=Hs.310359/UG_TITLE=ESTs                                                                              | 158,96 | 189,59 | 31,99 | 126,85 | 48,25 | 521,65 | 428,86 | 563,51 | 504,67 | 39,79 | 3,98 | 2,39 | 10,68* |
| 241773_at | gb:A1679812/DB_XREF=gi:4889994/DB_XREF=tv66a10.x1/CLONE=IMAGE:2255994/FEA=EST/CNT=3/TID=Hs.43057.0/TIER=ConsEnd/STK=3/UG=Hs.43057/UG_TITLE=ESTs    | AI679812 |        | gb:A1679812/DB_XREF=gi:4889994/DB_XREF=tv66a10.x1/CLONE=IMAGE:2255994/FEA=EST/CNT=3/TID=Hs.43057.0/TIER=ConsEnd/STK=3/UG=Hs.43057/UG_TITLE=ESTs                                                                               | 7,01   | 8,79   | 7,98  | 7,92   | 0,51  | 34,35  | 23,79  | 38,7   | 32,28  | 4,43  | 4,07 | 3,1  | 5,14*  |
| 242149_at | CAMP-binding guanine nucleotide exchange factor IV (CAMP-GEFIV) mRNA, clone W15, partial sequence                                                  | R02709   |        | gb:R02709/DB_XREF=gi:752445/DB_XREF=ve80g05.r1/CLONE=IMAGE:124088/FEA=EST/CNT=9/TID=Hs.289083.0/TIER=ConsEnd/STK=1/UG=Hs.289083/UG_TITLE=ESTs                                                                                 | 15,34  | 9,11   | 3,8   | 9,42   | 3,34  | 21,25  | 29,33  | 23,18  | 24,59  | 2,43  | 2,61 | 1,59 | 6,32*  |
| 242245_at | SYDE2: Synapse defective 1, Rho GTPase, homolog 2 (C. elegans)                                                                                     | N90719   | 84144  | gb:N90719/DB_XREF=gi:1444046/DB_XREF=za90a12.s1/CLONE=IMAGE:299806/FEA=EST/CNT=3/TID=Hs.94445.0/TIER=ConsEnd/STK=3/UG=Hs.94445/UG_TITLE=ESTs                                                                                  | 8,71   | 4,93   | 2,65  | 5,43   | 1,77  | 15,11  | 11,1   | 14,43  | 13,55  | 1,24  | 2,5  | 1,57 | 5,43*  |
| 243813_at | CDNA FLJ31059 fis, clone HSYRA200832                                                                                                               | AA418028 |        | gb:AA418028/DB_XREF=gi:2079857/DB_XREF=rv97f02.s1/CLONE=IMAGE:767739/FEA=EST/CNT=3/TID=Hs.98284.0/TIER=ConsEnd/STK=3/UG=Hs.98284/UG_TITLE=ESTs                                                                                | 32,09  | 21,27  | 10,21 | 21,19  | 6,32  | 115,61 | 99,67  | 62,45  | 92,58  | 15,75 | 4,37 | 2,6  | 8,9*   |
| 244025_at | gb:BF590917/DB_XREF=gi:11683241/DB_XREF=7h46a08.x1/CLONE=IMAGE:3318998/FEA=EST/CNT=6/TID=Hs.224432.0/TIER=ConsEnd/STK=3/UG=Hs.224432/UG_TITLE=ESTs | BF590917 |        | gb:BF590917/DB_XREF=gi:11683241/DB_XREF=7h46a08.x1/CLONE=IMAGE:3318998/FEA=EST/CNT=6/TID=Hs.224432.0/TIER=ConsEnd/STK=3/UG=Hs.224432/UG_TITLE=ESTs                                                                            | 25,11  | 24,22  | 34,83 | 28,05  | 3,4   | 73,93  | 47,16  | 57,25  | 59,44  | 7,8   | 2,12 | 1,57 | 2,85*  |

Supplementary Table 2: Differentially expressed genes in early type 1 diabetes compared to HC 1.5 fold change lower bound 90% CI

| probe set   | gene                                                                                                                                                                | Accession | EntrezGene | Description                                                                                                                                                                                                                                                                                                                                      | HC_109nMSC_(HG-U133_Plus_2)_CEL | HC_110nMSC_(HG-U133_Plus_2)_CEL | HC_RO1_(HG-U133_Plus_2)_CEL | baseline | baseline mean's SE | ES_T1D_A15_(HG-U133_Plus_2)_CEL | ES_T1D_A17_(HG-U133_Plus_2)_CEL | ES_T1D_A20_(HG-U133_Plus_2)_CEL | experiment mean | experiment mean's SE | fold change | lower bound of FC | upper bound of FC | filtered |
|-------------|---------------------------------------------------------------------------------------------------------------------------------------------------------------------|-----------|------------|--------------------------------------------------------------------------------------------------------------------------------------------------------------------------------------------------------------------------------------------------------------------------------------------------------------------------------------------------|---------------------------------|---------------------------------|-----------------------------|----------|--------------------|---------------------------------|---------------------------------|---------------------------------|-----------------|----------------------|-------------|-------------------|-------------------|----------|
| 1558882_at  | LOC401233: similar to HIV-1 Tat specific factor 1; cofactor required for Tat activation of HIV-1 transcription                                                      | BI868572  | 401233     | LOC401233.1 / DB_XREF=gi:16042245 / DB_XREF=6033926791 / CLONE=IMAGE:5402706 / TIER=Hs2.435991.1 / CNT=6 / FEA=mRNA / TIER=ConsEnd / JTK=0 / UG=Hs.435991 / UG_TITLE=Homo sapiens, clone IMAGE5402706 mRNA                                                                                                                                       | 2.43                            | 2.92                            | 2.21                        | 2.52     | 0.21               | 6.48                            | 8.34                            | 4.29                            | 6.37            | 1.17                 | 2.53        | 1.73              | 3.42 *            |          |
| 201348_at   | GPX3: glutathione peroxidase 3 (plasma)                                                                                                                             | NM_002084 | 2878       | gp:NM_002084.2 / DB_XREF=gi:6006000 / GEN=GPX3 / FEA=FlmRNA / CNT=468 / TID=Hs.172153.0 / TIER=FLStack / STK=256 / UG=Hs.172153 / LL=2878 / DEF=Homo sapiens glutathione peroxidase 3 (plasma) (GPX3), mRNA, / PROD=plasma glutathione peroxidase 3 precursor / FL=gb:NM_002084.2.gb:DD0632.1                                                    | 31.03                           | 21.62                           | 59.08                       | 37.25    | 11.25              | 13.08                           | 11.4                            | 12.16                           | 12.21           | 0.49                 | -3.05       | -1.53             | -4.59 *           |          |
| 201909_at   | RPS4Y1: ribosomal protein S4, Y-linked 1                                                                                                                            | NM_001008 | 6192       | gb:NM_001008.1 / DB_XREF=gi:4506735 / GEN=RPS4Y1 / FEA=FlmRNA / CNT=295 / TID=Hs.180911.0 / TIER=FLStack / STK=39 / UG=Hs.180911 / LL=6192 / DEF=Homo sapiens ribosomal protein S4, Y-linked (RPS4Y1), mRNA, / PROD=ribosomal protein S4, Y-linked                                                                                               | 35.42                           | 19.63                           | 2160.98                     | 738.67   | 711.17             | 3378.03                         | 4411.63                         | 3697.38                         | 3829.01         | 305.55               | 5.18        | 1.98              | 10000000 *        |          |
| 203131_at   | PDGFRA: platelet-derived growth factor receptor, alpha polypeptide                                                                                                  | NM_006206 | 5196       | gb:NM_006206.1 / DB_XREF=gi:5453869 / GEN=PDGFRA / FEA=FlmRNA / CNT=148 / TID=Hs.74615.0 / TIER=FLStack / STK=62 / UG=Hs.74615 / LL=5196 / DEF=Homo sapiens platelet-derived growth factor receptor, alpha polypeptide (PDGFRA), mRNA, / PROD=platelet-derived growth factor receptor, alpha polypeptide / FL=gb:NM_006206.1.gb:M21574.1         | 219.29                          | 299.5                           | 208.35                      | 242.38   | 28.73              | 861.2                           | 1286.74                         | 401.82                          | 849.92          | 255.52               | 3.51        | 1.74              | 5.55 *            |          |
| 204014_at   | DUSP4: dual specificity phosphatase 4                                                                                                                               | NM_001394 | 1846       | gb:NM_001394.2 / DB_XREF=gi:12707552 / GEN=DUSP4 / FEA=FlmRNA / CNT=105 / TID=Hs.2359.0 / TIER=FL / STK=4 / UG=Hs.2359 / LL=1846 / DEF=Homo sapiens dual specificity phosphatase 4 (DUSP4), mRNA, / PROD=dual specificity phosphatase 4 / FL=gb:NM_001394.2.gb:BC002671.1.gb:U48807.1.gb:U21108.1                                                | 21.41                           | 30.87                           | 13.55                       | 21.95    | 5.01               | 90.78                           | 34.2                            | 127                             | 83.99           | 27                   | 3.83        | 1.7               | 7.2 *             |          |
| 204409_s_at | EIF1A: eukaryotic translation initiation factor 1A, Y-linked                                                                                                        | BC005248  | 9086       | gb:BC005248.1 / DB_XREF=gi:13528902 / FEA=FlmRNA / CNT=143 / TID=Hs.15513.0 / TIER=FLStack / STK=59 / UG=Hs.15513 / LL=9086 / UG_GENE=EIF1A / DEF=Homo sapiens, clone MGC:12282, mRNA, complete cds. / PROD=Unknown (protein for MGC:12282) / FL=gb:AF000987.1.gb:NM_004681.1.gb:BC005248.1                                                      | 3.59                            | 3.55                            | 4.78                        | 3.97     | 0.4                | 172.62                          | 118.14                          | 236.4                           | 175.73          | 34.17                | 44.22       | 29.25             | 61.73 *           |          |
| 205000_at   | DDXKY: DEAD (Asp-Glu-Ala-Asp) box polypeptide 3, Y-linked                                                                                                           | NM_004660 | 8653       | gb:NM_004660.2 / DB_XREF=gi:13514808 / GEN=DDXKY / FEA=FlmRNA / CNT=47 / TID=Hs.59120.0 / TIER=FLStack / STK=11 / UG=Hs.59120 / LL=8653 / DEF=Homo sapiens DEAD (Asp-Glu-Ala-Asp) box polypeptide, Y chromosome (DDXKY), mRNA, / PROD=DEAD (Asp-Glu-Ala-Asp) box polypeptide, Y chromosome                                                       | 3.51                            | 2.46                            | 4.82                        | 3.59     | 0.68               | 99.7                            | 103.92                          | 106.79                          | 103.47          | 2.06                 | 28.79       | 21.88             | 41.95 *           |          |
| 205743_at   | STAC: SH3 and cysteine rich domain                                                                                                                                  | NM_003149 | 6769       | gb:NM_003149.1 / DB_XREF=gi:4507246 / GEN=STAC / FEA=FlmRNA / CNT=30 / TID=Hs.56045.0 / TIER=FLStack / STK=12 / UG=Hs.56045 / LL=6769 / DEF=Homo sapiens src homology three (SH3) and cysteine rich domain (STAC), mRNA, / PROD=src homology three (SH3) and cysteine rich domain / FL=gb:NM_003149.1.gb:D86640.1                                | 25.15                           | 34.92                           | 53.68                       | 37.92    | 8.37               | 94.2                            | 95.76                           | 63.58                           | 84.51           | 10.47                | 2.23        | 1.52              | 3.62 *            |          |
| 205830_at   | CLGN: calmagin                                                                                                                                                      | NM_004362 | 1047       | gb:NM_004362.1 / DB_XREF=gi:4508322 / GEN=CRYYB2 / FEA=FlmRNA / CNT=77 / TID=Hs.169286.0 / TIER=FL / STK=4 / UG=Hs.169286 / LL=1415 / DEF=Homo sapiens crystallin, beta B2 (CRYBB2), mRNA, / PROD=crystallin, beta B2 / FL=gb:U13035.1.gb:NM_000956.1                                                                                            | 3.05                            | 7.94                            | 2.16                        | 4.38     | 1.8                | 21.07                           | 16.63                           | 27.1                            | 21.6            | 3.03                 | 4.93        | 2.75              | 15.31 *           |          |
| 206777_s_at | CRYBB2: crystallin, beta B2                                                                                                                                         | NM_000496 | 1415       | gb:NM_000496.1 / DB_XREF=gi:7662399 / GEN=KIAA0951 / FEA=FlmRNA / CNT=3 / TID=Hs.227327.0 / TIER=FL / STK=0 / UG=Hs.227327 / LL=2282 / DEF=Homo sapiens KIAA0951 protein (KIAA0951), mRNA, / PROD=KIAA0951 protein                                                                                                                               | 210.04                          | 31.57                           | 272.46                      | 171.35   | 72.18              | 29.8                            | 31.61                           | 40.32                           | 33.91           | 3.25                 | -5.05       | -1.54             | -8.82 *           |          |
| 207703_at   | NLGN4Y: neuroligin 4, Y-linked                                                                                                                                      | NM_014893 | 22829      | gb:NM_014893.1 / DB_XREF=gi:11767830 / DB_XREF=6016580601 / CLONE=IMAGE:38762525 / FEA=FlmRNA / CNT=242 / TID=Hs.211579.2 / TIER=Stack / STK=14 / UG=Hs.211579 / LL=4162 / UG_GENE=MCAM / UG_TITLE=melanoma adhesion molecule                                                                                                                    | 4.47                            | 3.71                            | 3.31                        | 3.83     | 0.34               | 10.65                           | 15.43                           | 15.93                           | 15.34           | 2.55                 | 4           | 2.83              | 5.35 *            |          |
| 209086_x_at | MCAM: melanoma cell adhesion molecule                                                                                                                               | BE964361  | 4162       | gb:BE964361 / DB_XREF=gi:11767830 / DB_XREF=6016580601 / CLONE=IMAGE:38762525 / FEA=FlmRNA / CNT=242 / TID=Hs.211579.2 / TIER=Stack / STK=14 / UG=Hs.211579 / LL=4162 / UG_GENE=MCAM / UG_TITLE=melanoma adhesion molecule                                                                                                                       | 230.58                          | 160.89                          | 153.05                      | 181.51   | 24.64              | 101.77                          | 84.56                           | 83.28                           | 89.87           | 5.96                 | -2.02       | -1.54             | -2.55 *           |          |
| 209189_at   | FOS: v-fos FBJ murine osteosarcoma viral oncogene homolog                                                                                                           | BC004490  | 2353       | gb:BC004490.1 / DB_XREF=gi:13325363 / FEA=FlmRNA / CNT=139 / TID=Hs.25647.0 / TIER=FL / STK=0 / UG=Hs.25647 / LL=2353 / UG_GENE=FOS / DEF=Homo sapiens, v-fos FBJ murine osteosarcoma viral oncogene homolog, clone MGC:11074, mRNA, complete cds. / PROD=v-fos FBJ murine osteosarcoma viral oncogene homolog / FL=gb:NM_005252.2.gb:BC004490.1 | 9.46                            | 10.95                           | 10.38                       | 10.27    | 0.44               | 36.96                           | 21.79                           | 29.94                           | 29.56           | 4.38                 | 2.88        | 2.16              | 3.63 *            |          |
| 209291_at   | ID4: inhibitor of DNA binding 4, dominant negative helix-loop-helix protein                                                                                         | AW157094  | 3400       | gb:AW157094 / DB_XREF=gi:2282955 / FEA=FlmRNA / CNT=175 / TID=Hs.34853.0 / TIER=Stack / STK=26 / UG=Hs.34853 / LL=3400 / UG_GENE=ID4 / UG_TITLE=inhibitor of DNA binding 4, dominant negative helix-loop-helix protein / FL=gb:NM_001546.1                                                                                                       | 5.4                             | 86.79                           | 63.27                       | 68.02    | 9.76               | 319.92                          | 399.87                          | 122.13                          | 280.64          | 82.55                | 4.13        | 2.07              | 6.67 *            |          |
| 214983_at   | TTY15: testis-specific transcript, Y-linked 15                                                                                                                      | AL080135  | 64599      | gb:AL080135.1 / DB_XREF=gi:5262576 / FEA=mRNA / CNT=12 / TID=Hs.45068.0 / TIER=ConsEnd / STK=6 / UG=Hs.45068 / LL=64599 / UG_GENE=DKF2p434143 / UG_TITLE=hypothetical protein DKF2p434143 (from clone DKF2p434143)                                                                                                                               | 6.97                            | 6.28                            | 8.38                        | 7.21     | 0.62               | 14.98                           | 20.86                           | 12.25                           | 16.03           | 2.54                 | 2.22        | 1.6               | 2.94 *            |          |
| 226490_at   | NHSL1: Nhs-like 1                                                                                                                                                   | AA503387  | 57224      | gb:AA503387 / DB_XREF=gi:2338354 / DB_XREF=ne45c10.s1 / CLONE=IMAGE:900306 / FEA=mRNA / CNT=48 / TID=Hs.170162.1 / TIER=Stack / STK=16 / UG=Hs.170162 / LL=57224                                                                                                                                                                                 | 42.24                           | 38.24                           | 19.81                       | 33.43    | 6.91               | 69.48                           | 86.8                            | 63.22                           | 73.17           | 7.05                 | 2.19        | 1.56              | 3.39 *            |          |
| 227196_at   | RHPN2: rhophilin, rho GTPase binding protein 2                                                                                                                      | BG054987  | 8541       | gb:BG054987 / DB_XREF=gi:3441894 / DB_XREF=na93e04.x1 / CLONE=IMAGE:3441894 / FEA=mRNA / CNT=37 / TID=Hs.184598.0 / TIER=Stack / STK=16 / UG=Hs.184598 / UG_TITLE=Homo sapiens rhophilin 2, cDNA / UG_GENE=COL13P75                                                                                                                              | 6.18                            | 7.24                            | 5.52                        | 6.31     | 0.5                | 10.65                           | 11.68                           | 15.79                           | 12.71           | 1.57                 | 2.01        | 1.56              | 2.54 *            |          |
| 227705_at   | TCEAL7: transcription elongation factor A (SII)-like 7                                                                                                              | BF591534  | 56849      | gb:BF591534 / DB_XREF=gi:11683858 / DB_XREF=na93e04.x1 / CLONE=IMAGE:3277270 / FEA=mRNA / CNT=42 / TID=Hs.21861.0 / TIER=Stack / STK=13 / UG=Hs.21861 / LL=56849                                                                                                                                                                                 | 39.16                           | 73.24                           | 21.6                        | 44.67    | 15.16              | 117.69                          | 114.16                          | 102.35                          | 111.4           | 4.64                 | 2.49        | 1.59              | 5.66 *            |          |
| 228492_at   | USP9Y: ubiquitin specific peptidase 9, Y-linked (fat facets-like, Drosophila)                                                                                       | AV681765  | 8287       | gb:AV681765 / DB_XREF=gi:10283628 / DB_XREF=AV681765 / CLONE=GBR0805 / FEA=EST / CNT=21 / TID=Hs.1870.1 / TIER=Stack / STK=15 / UG=Hs.1870 / LL=5053 / UG_GENE=PAH / UG_TITLE=N-phenylalanine hydroxylase                                                                                                                                        | 3.56                            | 3.75                            | 3.6                         | 3.64     | 0.06               | 12.67                           | 25.62                           | 17.12                           | 18.47           | 3.8                  | 5.08        | 3.36              | 6.8 *             |          |
| 230744_at   | Transcribed locus                                                                                                                                                   | N22766    |            | gb:N22766 / DB_XREF=gi:138919 / DB_XREF=yyx5f08.s1 / CLONE=IMAGE:266631 / FEA=EST / CNT=17 / TID=Hs.42419.0 / TIER=Stack / STK=16 / UG=Hs.42419                                                                                                                                                                                                  | 19.97                           | 20.25                           | 20.79                       | 20.34    | 0.24               | 34.15                           | 74.25                           | 74.44                           | 60.95           | 13.4                 | 3           | 1.91              | 4.08 *            |          |
| 230760_at   | ZFY: Zinc finger protein, Y-linked                                                                                                                                  | BF592062  | 7544       | gb:BF592062 / DB_XREF=gi:11683858 / DB_XREF=na93e04.x1 / CLONE=IMAGE:3572962 / FEA=EST / CNT=11 / TID=Hs.233890.0 / TIER=Stack / STK=10 / UG=Hs.233890 / UG_TITLE=ESTs                                                                                                                                                                           | 2.78                            | 2.68                            | 2.68                        | 2.72     | 0.03               | 16.02                           | 13.88                           | 19.72                           | 16.54           | 1.71                 | 6.09        | 5.05              | 7.13 *            |          |
| 232618_at   | Cyorf15A: chromosome Y open reading frame 15A                                                                                                                       | AF332224  | 246126     | gb:AF332224.1 / DB_XREF=gi:13161080 / FEA=mRNA / CNT=9 / TID=Hs.171857.0 / TIER=ConsEnd / STK=5 / UG=Hs.171857 / DEF=Homo sapiens testis protein                                                                                                                                                                                                 | 3.3                             | 2.58                            | 3.84                        | 3.24     | 0.36               | 19.76                           | 15.82                           | 30.43                           | 22              | 4.37                 | 6.79        | 4.43              | 9.64 *            |          |
| 233512_at   | Clone 23571 and 23784 mRNA sequence                                                                                                                                 | AF035291  |            | gb:AF035291.1 / DB_XREF=gi:2661045 / FEA=mRNA / CNT=3 / TID=Hs.113744.0 / TIER=ConsEnd / STK=2 / UG=Hs.113744 / UG_TITLE=Homo sapiens clone 23571 and 23784 mRNA sequence                                                                                                                                                                        | 10.07                           | 8.59                            | 9.94                        | 9.53     | 0.47               | 22.23                           | 14.23                           | 21.88                           | 19.44           | 2.61                 | 2.04        | 1.57              | 2.53 *            |          |
| 236088_at   | NTNG1: netrin G1                                                                                                                                                    | AV723308  | 22854      | gb:AV723308 / DB_XREF=gi:10283628 / DB_XREF=AV723308 / CLONE=HTBFC07 / FEA=EST / CNT=11 / TID=Hs.171136.0 / TIER=ConsEnd / STK=2 / UG=Hs.171136 / UG_TITLE=ESTs                                                                                                                                                                                  | 6.98                            | 9.63                            | 8.31                        | 8.31     | 0.77               | 20.86                           | 33                              | 27.02                           | 26.96           | 3.5                  | 3.24        | 2.46              | 4.19 *            |          |
| 238178_at   | BF110268 / DB_XREF=gi:10939958 / DB_XREF=7n51g03.x1 / CLONE=IMAGE:3568301 / FEA=EST / CNT=6 / TID=Hs.264433.0 / TIER=ConsEnd / STK=6 / UG=Hs.264433 / UG_TITLE=ESTs | BF110268  |            | gb:BF110268 / DB_XREF=gi:10939958 / DB_XREF=7n51g03.x1 / CLONE=IMAGE:3568301 / FEA=EST / CNT=6 / TID=Hs.264433.0 / TIER=ConsEnd / STK=6 / UG=Hs.264433 / UG_TITLE=ESTs                                                                                                                                                                           | 3.61                            | 2.68                            | 3.16                        | 3.15     | 0.27               | 11.1                            | 12.93                           | 6.16                            | 10.06           | 2.02                 | 3.2         | 2.1               | 4.42 *            |          |



|             |                                                                                                                                                                                                                               |          |        |                                                                                                                                                                                                                                           |        |        |        |        |       |        |        |        |        |        |       |       |          |
|-------------|-------------------------------------------------------------------------------------------------------------------------------------------------------------------------------------------------------------------------------|----------|--------|-------------------------------------------------------------------------------------------------------------------------------------------------------------------------------------------------------------------------------------------|--------|--------|--------|--------|-------|--------|--------|--------|--------|--------|-------|-------|----------|
| 238312_at   | ANKRD29: ankyrin repeat domain 29                                                                                                                                                                                             | AI307802 | 147463 | gb:AI307802 /DB_XREF=gi:4002406 /DB_XREF=tb28:210.x1 /CLONE=IMAGE:2055666 /FEA=EST /CNT=23 /TID=Hs.135560.0 /TIER=ConsEnd /STK=4 /UG=Hs.135560 /JUG_TITLE=ESTs, Weakly similar to T43458 hypothetical protein DKFZp434F0621.1 (H.sapiens) | 16,09  | 53,76  | 14,23  | 28,03  | 12,88 | 101,38 | 131,74 | 47,8   | 93,64  | 24,54  | 3,34  | 1,51  | 14,09 *  |
| 238623_at   | CDNA FLJ37310 fis, clone BRAMY2016706                                                                                                                                                                                         | AI633559 |        | gb:AW945538 /DB_XREF=gi:8123293 /DB_XREF=RCD-EN0024-120500-031-a06 /FEA=EST /CNT=7 /TID=Hs.194589.0 /TIER=ConsEnd /STK=0 /JUG=Hs.194589 /JUG_TITLE=ESTs                                                                                   | 158,96 | 189,59 | 31,99  | 126,85 | 48,25 | 725,56 | 547,24 | 302,72 | 525,18 | 122,56 | 4,14  | 2,08  | 11,52 *  |
| 239208_s_at | gb:AW945538 /DB_XREF=gi:8123293 /DB_XREF=RCD-EN0024-120500-031-a06 /FEA=EST /CNT=7 /TID=Hs.194589.0 /TIER=ConsEnd /STK=0 /JUG=Hs.194589 /JUG_TITLE=ESTs                                                                       | AW945538 |        | gb:AW945538 /DB_XREF=gi:8123293 /DB_XREF=RCD-EN0024-120500-031-a06 /FEA=EST /CNT=7 /TID=Hs.194589.0 /TIER=ConsEnd /STK=0 /JUG=Hs.194589 /JUG_TITLE=ESTs                                                                                   | 89,66  | 77,88  | 91,81  | 86,45  | 4,33  | 27,42  | 44,35  | 6,95   | 26,24  | 10,81  | -3,29 | -1,95 | -10,24 * |
| 244740_at   | MGC9913: Hypothetical protein MGC9913                                                                                                                                                                                         | BE855713 | 386739 | gb:BE855713 /DB_XREF=gi:10368199 /DB_XREF=7g0809.x1 /CLONE=IMAGE:3305873 /FEA=EST /CNT=6 /TID=Hs.23133.1 /TIER=ConsEnd /STK=2 /JUG=Hs.23133 /JUG_TITLE=ESTs, Weakly similar to A33569 alcohol sulfotransferase (R.norvegicus)             | 186,18 | 218,76 | 230,09 | 211,67 | 13,16 | 74,28  | 100,91 | 79,17  | 84,78  | 8,18   | -2,5  | -2,08 | -3,04 *  |
| 244741_s_at | gb:BE855713 /DB_XREF=gi:10368199 /DB_XREF=7g0809.x1 /CLONE=IMAGE:3305873 /FEA=EST /CNT=6 /TID=Hs.23133.1 /TIER=ConsEnd /STK=2 /JUG=Hs.23133 /JUG_TITLE=ESTs, Weakly similar to A33569 alcohol sulfotransferase (R.norvegicus) | BE855713 |        | gb:BE855713 /DB_XREF=gi:10368199 /DB_XREF=7g0809.x1 /CLONE=IMAGE:3305873 /FEA=EST /CNT=6 /TID=Hs.23133.1 /TIER=ConsEnd /STK=2 /JUG=Hs.23133 /JUG_TITLE=ESTs, Weakly similar to A33569 alcohol sulfotransferase (R.norvegicus)             | 181,36 | 182,23 | 164,49 | 176,02 | 5,77  | 72,78  | 85,11  | 66,38  | 74,75  | 5,5    | -2,35 | -2,07 | -2,71 *  |

**Supplementary Table 3. Gene ontology analysis comparing MSCs from healthy and late stage T1D donors**

| <b>GO term and p-val</b>                            | <b>Gene name</b> | <b>Acc. No.</b> | <b>Healthy<br/>(mean, n=3)</b> | <b>Late T1D<br/>(mean, n=3)</b> | <b>Fold<br/>difference</b> |
|-----------------------------------------------------|------------------|-----------------|--------------------------------|---------------------------------|----------------------------|
| <b>Growth factor activity</b><br>p-val:0.000536     | BMP2             | AA583044        | 11.65                          | 65.76                           | 5.65                       |
|                                                     | CXCL1            | NM_001511       | 22.31                          | 92.00                           | 4.12                       |
|                                                     | ESM1             | NM_007036       | 14.31                          | 64.15                           | 4.48                       |
|                                                     | HBEGF            | NM_001945       | 132.04                         | 304.98                          | 2.31                       |
|                                                     | HGF              | X16323          | 5.96                           | 29.60                           | 4.96                       |
|                                                     | IL6              | NM_000600       | 134.99                         | 550.05                          | 4.07                       |
|                                                     | JAG1             | U61276          | 7.30                           | 16.59                           | 2.27                       |
|                                                     | LIF              | NM_002309       | 96.17                          | 424.03                          | 4.41                       |
| <b>Multicellular<br/>organismal<br/>development</b> |                  |                 |                                |                                 |                            |
| p-val:0.000373                                      | AEBP1            | NM_001129       | 233.34                         | 119.87                          | -1.95                      |
|                                                     | BGN              | AA845258        | 1543.09                        | 672.72                          | -2.29                      |
|                                                     | BMP2             | AA583044        | 11.65                          | 65.76                           | 5.65                       |
|                                                     | CHRD1            | AL049176        | 24.52                          | 73.89                           | 3.01                       |
|                                                     | COL8A1           | BE877796        | 11.01                          | 51.69                           | 4.69                       |
|                                                     | CXCL1            | NM_001511       | 22.31                          | 92.00                           | 4.12                       |
|                                                     | DCN              | AF138300        | 353.05                         | 1493.53                         | 4.23                       |
|                                                     | DLX2             | NM_004405       | 14.52                          | 153.04                          | 10.54                      |
|                                                     | EGR2             | NM_000399       | 114.78                         | 297.12                          | 2.59                       |
|                                                     | FST              | NM_013409       | 251.82                         | 749.26                          | 2.98                       |
|                                                     | FUT8             | AB049740        | 16.79                          | 44.53                           | 2.65                       |
|                                                     | GADD45B          | NM_015675       | 510.13                         | 1773.22                         | 3.48                       |
|                                                     | GSTM3            | AL527430        | 821.32                         | 342.38                          | -2.4                       |
|                                                     | HBEGF            | NM_001945       | 132.04                         | 304.98                          | 2.31                       |
|                                                     | ID1              | D13889          | 330.87                         | 986.90                          | 2.98                       |
|                                                     | JAG1             | U61276          | 7.30                           | 16.59                           | 2.27                       |
|                                                     | KLF10            | NM_005655       | 604.70                         | 2208.35                         | 3.65                       |
| LAMA4                                               | NM_002290        | 65.75           | 194.97                         | 2.97                            |                            |

|        |           |        |        |       |
|--------|-----------|--------|--------|-------|
| LIF    | NM_002309 | 96.17  | 424.03 | 4.41  |
| LMO4   | AI824831  | 198.35 | 99.48  | -1.99 |
| MBNL1  | AL562860  | 6.39   | 15.52  | 2.43  |
| MGP    | NM_000900 | 22.68  | 113.46 | 5     |
| MTPN   | AF130088  | 16.06  | 46.23  | 2.88  |
| NKX3-1 | AF247704  | 33.61  | 97.79  | 2.91  |
| NPR3   | AI628360  | 23.12  | 100.80 | 4.36  |
| PRRX1  | NM_006902 | 53.03  | 169.14 | 3.19  |
| PTP4A1 | BF576710  | 89.69  | 254.69 | 2.84  |
| QKI    | AF142421  | 24.68  | 62.31  | 2.53  |
| SFRP1  | NM_003012 | 14.70  | 48.37  | 3.29  |
| SKIL   | NM_005414 | 7.07   | 18.72  | 2.65  |
| SPRY2  | NM_005842 | 129.53 | 281.03 | 2.17  |
| TRIM14 | BE962483  | 30.32  | 14.43  | -2.1  |

---

**Multicellular**

|                           |         |           |         |         |       |
|---------------------------|---------|-----------|---------|---------|-------|
| <b>organismal process</b> | ADORA2B | NM_000676 | 34.93   | 71.83   | 2.06  |
| p-val:0.000484            | AEBP1   | NM_001129 | 233.34  | 119.87  | -1.95 |
|                           | BGN     | AA845258  | 1543.09 | 672.72  | -2.29 |
|                           | BMP2    | AA583044  | 11.65   | 65.76   | 5.65  |
|                           | BPGM    | NM_001724 | 134.03  | 326.49  | 2.44  |
|                           | CHRD1   | AL049176  | 24.52   | 73.89   | 3.01  |
|                           | COL8A1  | BE877796  | 11.01   | 51.69   | 4.69  |
|                           | CXCL1   | NM_001511 | 22.31   | 92      | 4.12  |
|                           | DCN     | AF138300  | 353.05  | 1493.53 | 4.23  |
|                           | DLX2    | NM_004405 | 14.52   | 153.04  | 10.54 |
|                           | DNM1    | AF035321  | 141.23  | 30.56   | -4.62 |
|                           | EGR2    | NM_000399 | 114.78  | 297.12  | 2.59  |
|                           | FST     | NM_013409 | 251.82  | 749.26  | 2.98  |
|                           | FUT8    | AB049740  | 16.79   | 44.53   | 2.65  |
|                           | GADD45B | NM_015675 | 510.13  | 1773.22 | 3.48  |
|                           | GSTM3   | AL527430  | 821.32  | 342.38  | -2.4  |
|                           | HBEGF   | NM_001945 | 132.04  | 304.98  | 2.31  |
|                           | HGF     | X16323    | 5.96    | 29.6    | 4.96  |

|         |           |        |         |       |
|---------|-----------|--------|---------|-------|
| ID1     | D13889    | 330.87 | 986.9   | 2.98  |
| IL6     | NM_000600 | 134.99 | 550.05  | 4.07  |
| JAG1    | U61276    | 7.3    | 16.59   | 2.27  |
| KLF10   | NM_005655 | 604.7  | 2208.35 | 3.65  |
| LAMA4   | NM_002290 | 65.75  | 194.97  | 2.97  |
| LIF     | NM_002309 | 96.17  | 424.03  | 4.41  |
| LMAN1   | NM_005570 | 9.36   | 19      | 2.03  |
| LMO4    | AI824831  | 198.35 | 99.48   | -1.99 |
| MBNL1   | AL562860  | 6.39   | 15.52   | 2.43  |
| MGP     | NM_000900 | 22.68  | 113.46  | 5     |
| MTPN    | AF130088  | 16.06  | 46.23   | 2.88  |
| NKX3-1  | AF247704  | 33.61  | 97.79   | 2.91  |
| NPR3    | AI628360  | 23.12  | 100.8   | 4.36  |
| PDE7B   | AI638433  | 56.96  | 173.43  | 3.04  |
| PLAU    | NM_002658 | 547.45 | 1228.22 | 2.24  |
| PRRX1   | NM_006902 | 53.03  | 169.14  | 3.19  |
| PTGS2   | AY151286  | 3.38   | 22.76   | 6.73  |
| PTGFR   | BC035694  | 3.96   | 20.03   | 5.05  |
| PTP4A1  | BF576710  | 89.69  | 254.69  | 2.84  |
| QKI     | AF142421  | 24.68  | 62.31   | 2.53  |
| SCUBE3  | AI733234  | 39.67  | 142.95  | 3.6   |
| SFRP1   | NM_003012 | 14.7   | 48.37   | 3.29  |
| SKIL    | NM_005414 | 7.07   | 18.72   | 2.65  |
| SLC19A2 | AF153330  | 38.13  | 106.71  | 2.8   |
| SPRY2   | NM_005842 | 129.53 | 281.03  | 2.17  |
| TFPI    | J03225    | 5.74   | 22.11   | 3.85  |
| TRIM14  | BE962483  | 30.32  | 14.43   | -2.1  |

---

**Response to external**

|                 |       |           |        |        |      |
|-----------------|-------|-----------|--------|--------|------|
| <b>stimulus</b> | CDO1  | NM_001801 | 39.22  | 105.29 | 2.68 |
| p-val:0.000694  | CXCL1 | NM_001511 | 22.31  | 92     | 4.12 |
|                 | CXCL6 | NM_002993 | 13.5   | 103.9  | 7.69 |
|                 | EGR2  | NM_000399 | 114.78 | 297.12 | 2.59 |
|                 | FOS   | BC004490  | 10.27  | 74.03  | 7.21 |

|                             |         |           |        |         |      |
|-----------------------------|---------|-----------|--------|---------|------|
|                             | HGF     | X16323    | 5.96   | 29.6    | 4.96 |
|                             | IL1R1   | NM_000877 | 103.58 | 275.49  | 2.66 |
|                             | IL6     | NM_000600 | 134.99 | 550.05  | 4.07 |
|                             | LMAN1   | NM_005570 | 9.36   | 19      | 2.03 |
|                             | PLAU    | NM_002658 | 547.45 | 1228.22 | 2.24 |
|                             | PPARG   | NM_015869 | 19.69  | 42.24   | 2.15 |
|                             | PTGS2   | AY151286  | 3.38   | 22.76   | 6.73 |
|                             | SCUBE3  | AI733234  | 39.67  | 142.95  | 3.6  |
|                             | TFPI    | J03225    | 5.74   | 22.11   | 3.85 |
| <b>Response to stress</b>   | PTGS2   | AY151286  | 3.38   | 22.76   | 6.73 |
| p-val:0.000198              | POLH    | AW665155  | 15.66  | 34.81   | 2.22 |
|                             | HSPD1   | BE256479  | 213.15 | 676.38  | 3.17 |
|                             | DUSP1   | NM_004417 | 380.83 | 1028.96 | 2.7  |
|                             | SGK     | NM_005627 | 503.32 | 1140.31 | 2.27 |
|                             | BNIP3   | U15174    | 205.97 | 649.76  | 3.15 |
|                             | IL1R1   | NM_000877 | 103.58 | 275.49  | 2.66 |
|                             | LMAN1   | NM_005570 | 9.36   | 19      | 2.03 |
|                             | CDO1    | NM_001801 | 39.22  | 105.29  | 2.68 |
|                             | CXCL1   | NM_001511 | 22.31  | 92      | 4.12 |
|                             | SMAD7   | NM_005904 | 186.15 | 602.69  | 3.24 |
|                             | IL6     | NM_000600 | 134.99 | 550.05  | 4.07 |
|                             | GALK2   | NM_002044 | 26.01  | 52.65   | 2.02 |
|                             | PLAU    | NM_002658 | 547.45 | 1228.22 | 2.24 |
|                             | HSPA4L  | NM_014278 | 9.43   | 18.47   | 1.96 |
|                             | CXCL6   | NM_002993 | 13.5   | 103.9   | 7.69 |
|                             | GADD45B | NM_015675 | 510.13 | 1773.22 | 3.48 |
|                             | FOS     | BC004490  | 10.27  | 74.03   | 7.21 |
|                             | TFPI    | J03225    | 5.74   | 22.11   | 3.85 |
|                             | HGF     | X16323    | 5.96   | 29.6    | 4.96 |
|                             | SCUBE3  | AI733234  | 39.67  | 142.95  | 3.6  |
| <b>Response to wounding</b> | PTGS2   | AY151286  | 3.38   | 22.76   | 6.73 |
| p-val:0.000419              | IL1R1   | NM_000877 | 103.58 | 275.49  | 2.66 |
|                             | LMAN1   | NM_005570 | 9.36   | 19      | 2.03 |

|                           |           |           |        |         |      |
|---------------------------|-----------|-----------|--------|---------|------|
|                           | CDO1      | NM_001801 | 39.22  | 105.29  | 2.68 |
|                           | CXCL1     | NM_001511 | 22.31  | 92      | 4.12 |
|                           | IL6       | NM_000600 | 134.99 | 550.05  | 4.07 |
|                           | PLAU      | NM_002658 | 547.45 | 1228.22 | 2.24 |
|                           | CXCL6     | NM_002993 | 13.5   | 103.9   | 7.69 |
|                           | FOS       | BC004490  | 10.27  | 74.03   | 7.21 |
|                           | TFPI      | J03225    | 5.74   | 22.11   | 3.85 |
|                           | HGF       | X16323    | 5.96   | 29.6    | 4.96 |
|                           | SCUBE3    | AI733234  | 39.67  | 142.95  | 3.6  |
| <hr/>                     |           |           |        |         |      |
| <b>Protein domain</b>     |           |           |        |         |      |
| <b>Adenylate kinase</b>   | LOC645619 | AI653169  | 19.76  | 74.69   | 3.78 |
| p-val:0.000763            | AK3L1     | NM_013410 | 103.58 | 334.94  | 3.23 |
|                           | AK2       | NM_013411 | 37.55  | 67.71   | 1.8  |
| <hr/>                     |           |           |        |         |      |
| <b>Pathway TGFb</b>       |           |           |        |         |      |
| <b>signaling</b>          | JAK1      | NM_002227 | 25.87  | 63.89   | 2.47 |
| p-val:0.000023            | SMAD7     | NM_005904 | 186.15 | 602.69  | 3.24 |
|                           | FST       | NM_013409 | 251.82 | 749.26  | 2.98 |
|                           | LIF       | NM_002309 | 96.17  | 424.03  | 4.41 |
|                           | SKIL      | NM_005414 | 7.07   | 18.72   | 2.65 |
|                           | FOS       | BC004490  | 10.27  | 74.03   | 7.21 |
|                           | ZNF423    | AW149417  | 40.88  | 119.93  | 2.93 |
| <hr/>                     |           |           |        |         |      |
| <b>Chromosome '20p12'</b> |           |           |        |         |      |
| <b>genes</b>              | BMP2      | AA583044  | 11.65  | 65.76   | 5.65 |
| p-val:0.000037            | JAG1      | U61276    | 7.3    | 16.59   | 2.27 |
|                           | PLCB1     | AL049593  | 17.39  | 48.61   | 2.8  |
|                           | C20orf30  | NM_014145 | 138.9  | 403.43  | 2.9  |
|                           | C20orf82  | AI816793  | 7.36   | 30.79   | 4.19 |

Gene ontology (GO)-term analysis for 1.5-fold differentially expressed genes comparing MSCs from healthy and late stage T1D donors. The data was compared by dCHIP using lower bound of 90% CI.

## **SUPPLEMENTAL DATA**

**Supplementary Table 1: Differentially expressed genes in LT1D compared to HC 1.5**

**fold change lower bound 90% CI**

**Supplementary Table 2: Differentially expressed genes in ET1D compared to HC 1.5**

**fold change lower bound 90% CI**

**Supplementary Table 3: Gene ontology analysis comparing MSCs from healthy and late**

**stage T1D donors**

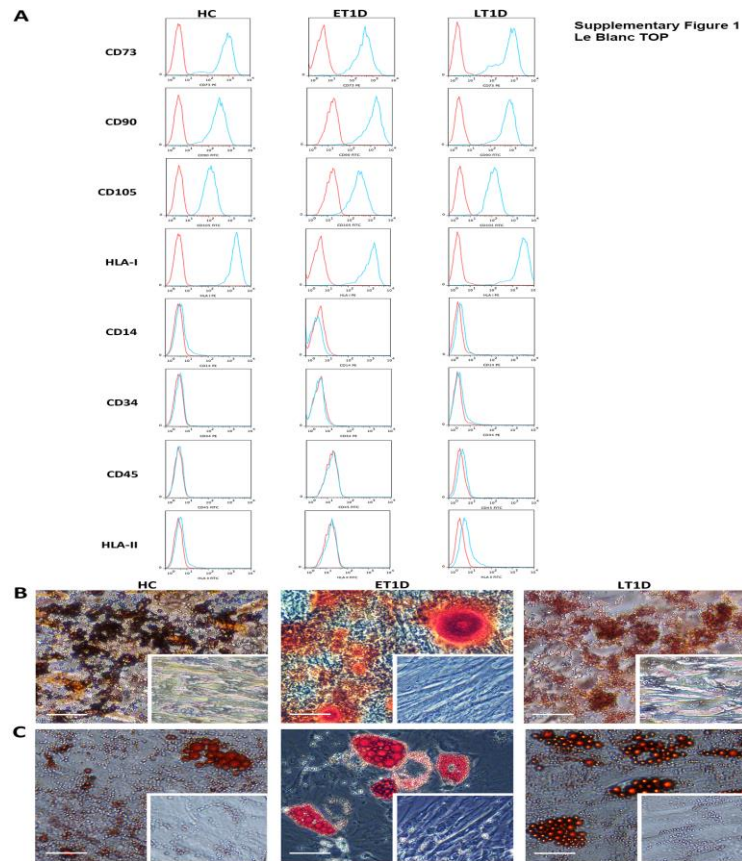

**Supplementary Figure 1: Characterization of MSCs according to ISCT guidelines.**

Isolated bone marrow cells from T1D donors and HCs were characterized as MSCs according to current standards. **(A)** Flow cytometry analyses confirmed expression of MSC-marker profile (positive for CD73, CD90, CD105 and HLA-I and negative for CD14, CD34, CD45 and HLA-II). Differentiation assays confirmed **(B)** osteogenic capacity as demonstrated by Alizarin red staining, and **(C)** adipogenic capacity as demonstrated by Oil red O staining. Scale bars=20  $\mu$ m; small inserts represents non-induced control cultures.
